# Supplementary material for: Ethanol promoted titanocene Lewis acid catalyzed synthesis of quinazoline derivatives
Source: Royal Society of Chemistry journal article supplement (doi:10.1039/c6ra14583c), 2016-01-01

## Ethanol Initiated Titanocene Lewis Acid Catalyzed Diversity- oriented Synthesis of Quinazoline Derivatives

Yanlong Luo, Ya Wu, Yunyun Wang, Huaming Sun, Zunyuan Xie, Weiqiang Zhang\*  
and Ziwei Gao\*

*Key Laboratory of Applied Surface and Colloid Chemistry (Ministry of Education), School of  
Chemistry and Chemical Engineering, Shaanxi Normal University, Xi'an 710062, P. R. China*

E-mail: zwgao@snnu.edu.cn; Fax: +86-29-81530821

|                                                                       |    |
|-----------------------------------------------------------------------|----|
| 1. General procedures .....                                           | 2  |
| 2. Typical procedures for synthesis of quinazolinones .....           | 2  |
| 3 Screening of solvent for synthesis of quinazolinones .....          | 2  |
| 4. Screening of temperature for synthesis of quinazolinones .....     | 3  |
| 5. NMR experiments .....                                              | 4  |
| 6. Spectrometric analysis .....                                       | 4  |
| 7. Characterization data of products .....                            | 5  |
| 8. HRMS spectra .....                                                 | 9  |
| 9. Copies of <sup>1</sup> H NMR and <sup>13</sup> C NMR spectra ..... | 11 |

## 1. General procedures

$^1\text{H}$  and  $^{13}\text{C}$  NMR spectra were recorded on a Bruker EQUINX55 (400 MHz for  $^1\text{H}$ ; 101 MHz for  $^{13}\text{C}$ ) spectrometer in  $\text{CDCl}_3$ . For  $^1\text{H}$  NMR, tetramethylsilane (TMS) served as internal standard ( $\delta = 0$ ) and  $^1\text{H}$  NMR chemical shifts are reported in ppm downfield of tetramethylsilane and referenced to residual solvent peak ( $\text{CDCl}_3$  at 7.26 ppm) unless otherwise noted. The data are reported as follows: chemical shift, integration, multiplicity (s = singlet, d = doublet, t = triplet, q = quartet and m = multiplet), and coupling constant in Hz. For  $^{13}\text{C}$  NMR,  $\text{CDCl}_3$  was used as internal standard ( $\delta = 77.0$ ) and spectra were obtained with complete proton decoupling. Infrared (IR) spectra were obtained using a Thermo Electron Nicolet 380 FT-IR spectrometer and reported as wavenumbers ( $\text{cm}^{-1}$ ). Column chromatography was performed on silica gel (230-400 mesh) and analytical thin layer chromatography was carried out using 250  $\mu\text{m}$  commercial silica gel plates. Visualization of the developed chromatogram was performed by UV absorbance and stained with an iodine vapor.

## 2. Typical procedures for synthesis of quinazolinones

A 10 mL test tube, equipped with a magnetic stirrer and a septum, was charged with ethanol (0.5 mL), benzaldehyde (1.0 mmol), and anthralinamide (1.0 mmol), in one portion.  $\text{Cp}_2\text{TiCl}_2$  (0.01 mmol) was added at 30  $^\circ\text{C}$  and stirred until the reaction was completed as indicated by TLC. Upon completion of the reaction, the reaction mixture was quenched with distilled water (5.0 mL). The aqueous phase was extracted with ether (3 $\times$ 5 mL), dried over  $\text{Na}_2\text{SO}_4$  and concentrated in vacuo to give desired products. The corresponding solid products were obtained through column chromatography by using 100–200 mesh silica gels.

## 3 Screening of solvent for synthesis of quinazolinones

To further investigate the effect of solvents, next we examined our reaction in different solvent systems as show in Table s1. The catalytic activity of  $\text{Cp}_2\text{TiCl}_2$  in the reaction of anthranilamide and benzaldehyde was greatly influenced by solvents as show in Table s1. At first, non-polar solvent *n*-hexane was evaluated, we can found  $\text{Cp}_2\text{TiCl}_2$  almost inert in *n*-hexane only obtained 20% yield (entry 1).  $\text{CH}_2\text{Cl}_2$ , THF and  $\text{PhCH}_3$  can slightly accelerated  $\text{Cp}_2\text{TiCl}_2$  in this reaction obtained 40%, 57 % and 45% yields respectively (entries 2-4). More polar solvent such as  $\text{CH}_3\text{CN}$ , DMF and DMSO were obviously accelerated  $\text{Cp}_2\text{TiCl}_2$  in this reaction obtained 43%, 40% and 45% yields respectively (entries 5-7). To our surprise, when employing MeOH as solvent, the condensation reaction accelerated dramatically and furnished quinazoline in 87% yield a little lower than EtOH (entries 8 and 9). According to above result, we found that alcohols are a kind of effective solvent in promoting  $\text{Cp}_2\text{TiCl}_2$  catalyzes the reaction of anthranilamide and *p*-anisaldehyde. In order to prove whether the protons and hydrogen-bonding promote the

reaction, water as the solvent was studied. However, only 6% yield was detected (entry10). The result indicates that neither protons nor hydrogen-bonding interaction is responsible for the catalytic activity of  $\text{Cp}_2\text{TiCl}_2$ .

Table s1, Screening of solvent for synthesis of quinazolinones

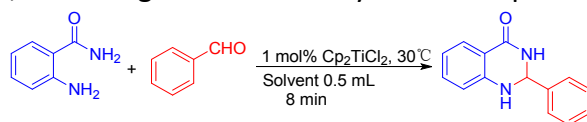

| Entry | Solvent                  | Yield(%) <sup>b</sup> |
|-------|--------------------------|-----------------------|
| 1     | <i>n</i> -hexnane        | 20                    |
| 2     | $\text{CH}_2\text{Cl}_2$ | 40                    |
| 3     | THF                      | 52                    |
| 4     | $\text{PhCH}_3$          | 45                    |
| 5     | $\text{CH}_3\text{CN}$   | 43                    |
| 6     | DMF                      | 40                    |
| 7     | DMSO                     | 45                    |
| 8     | MeOH                     | 87                    |
| 9     | EtOH                     | 97                    |
| 10    | $\text{H}_2\text{O}$     | 6                     |

<sup>a</sup>Reaction conditions: anthranilamide (1 mmol), benzaldehyde (1 mmol), catalyst 0.01mmol(1 mol %) and ethanol (0.5 mL) <sup>b</sup>Isolated yields.

#### 4. Screening of temperature for synthesis of quinazolinones

Table s2. Screening of temperature

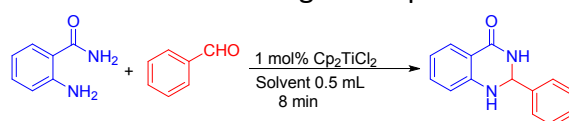

| Entry | Temperature (°C) | Yield(%) <sup>a</sup> |
|-------|------------------|-----------------------|
| 1     | 30               | 97                    |
| 2     | 40               | 90                    |
| 3     | 50               | 87                    |

<sup>a</sup>Yield of isolated product

In order to further optimize conditions, we checked the effect of temperature on the progress of the reaction, the results of these experiments are shown in Table s2. The model reaction was tested at different temperatures like 30°C, 40°C and 50°C. According to the results in table 3 we can see that 30°C is the best reaction temperature, when raise the temperature, the yield did not increase.

## 5. NMR experiments

The interplay of  $\text{Cp}_2\text{TiCl}_2$  and ethanol was investigated by  $^1\text{H}$  NMR in mechanistic scenario. A general procedure was as follows:  $\text{Cp}_2\text{TiCl}_2$  (10  $\mu\text{mol}$ ) was placed in  $\text{CD}_3\text{OD}$  (0.5mL) and the solution was detected immediately as observed by  $^1\text{H}$  NMR spectroscopy. The mixture was allowed to stand for 1 h and was conducted by  $^1\text{H}$  NMR spectroscopy as confirmed by  $^1\text{H}$  NMR spectroscopy. After 1.0 equiv. of aniline was added in the above solution, one new Cp protons singlet appeared at  $\delta$  6.25 ppm. Titanocene chloride (I) was consumed gradually in  $\text{CD}_3\text{OD}$  in the presence of base and formed new titanocene species  $\text{Cp}_2\text{TiCl}(\text{OCH}_3)$  (III), As the singlet at 6.25 ppm increased, one new Cp protons singlet  $\text{Cp}_2\text{Ti}(\text{OCH}_2\text{CH}_3)_2$  (II) appeared at  $\delta$  6.34 ppm

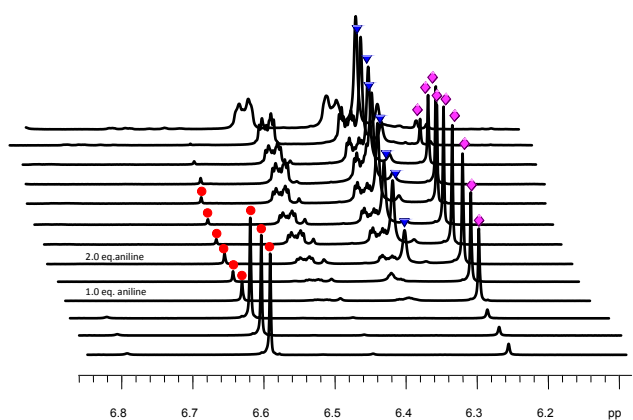

**Fig. S1** Partial 400MHz  $^1\text{H}$  NMR spectra ( $\text{CD}_3\text{CD}_2\text{OD}$ ) of a solution containing  $\text{Cp}_2\text{TiCl}_2$  with addition of aniline.   
● 6.59 ppm I [ $\text{Cp}_2\text{TiCl}_2$ ]; ◆ 6.25 ppm III [ $\text{Cp}_2\text{TiCl}(\text{OCH}_2\text{CH}_3)$ ]; ▼ 6.34 ppm II [ $\text{Cp}_2\text{Ti}(\text{OCH}_2\text{CH}_3)_2$ ]

## 6. Spectrometric analysis

Mass spectrometric measurements were performed in a Bruker EVOQ tandem mass spectrometer. As a general rule, scan mode was Q1MS, positive ion mode (otherwise indicated), tube lens potential was optimized in each case or for a series of measurements that required equal conditions, a time span of 1 minute was used to collect spectra and average them. The tube lens potential was adjusted in a way that the most interest ions had almost no attenuation (around 70 V).

For CID experiments, the cations of interest were mass-selected using the first quadrupole (Q1) and interacted with argon in the T-wave collision cell at variable collision energies (Elaboratory = 3-15 eV). The ionic products of fragmentation were analyzed with the time-of-flight analyzer. The isolation width was 1 Da and the most abundant isotopomer was mass-selected in the first quadrupole analyzer.

## 7. Characterization data of products

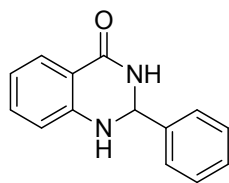

3a

2-Phenyl-2,3-dihydroquinazolin-4(1H)-one(3a), white solid. Yield: (96%).<sup>1</sup>H

NMR (400MHz, DMSO-d<sub>6</sub>) δ: 8.30 (s, 1H) , 7.64 (d, J=7.6Hz, 1H) , 7.51 (d, J=7.2Hz, 2H) , 7.40 (s, 3H) , 7.30-7.20 (m, 1H) , 7.12 (s, 1H) , 6.77 (d, J=8.1Hz, 1H) , 6.69 (s, 1H) , 5.77 (s, 1H) ; <sup>13</sup>C NMR (101MHz, DMSO-d<sub>6</sub>) δ: 165.50, 149.76, 143.52, 135.20, 130.34, 130.21, 129.25, 128.75, 119.01, 116.85, 116.30, 68.47.

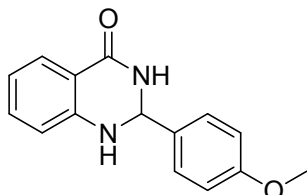

3b

2-(4-Methoxyphenyl)-2,3-dihydroquinazolin-4(1H)-one (3b).white solid. Yield: (97%).<sup>1</sup>H

NMR (400MHz, DMSO-d<sub>6</sub>) δ: 8.19 (s, 1H) , 7.62 (d, J=7.6Hz, 1H) , 7.43 (d, J=8.6Hz, 2H) , 7.25 (s, 1H) , 7.02 (s, 1H) , 6.96 (s, 2H) , 6.75 (d, J=8.1Hz, 1H) , 6.68 (s, 1H) , 5.72 (s, 1H) , 3.75 (s, 3H) ; <sup>13</sup>C NMR (101MHz, DMSO-d<sub>6</sub>) δ: 165.59, 161.32, 149.90, 135.36, 135.12, 130.10, 129.23, 118.97, 116.89, 116.30,

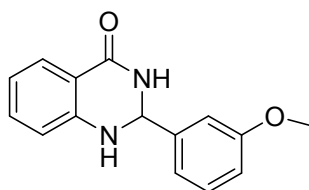

115.52, 68.20, 57.06.

3c

2-(3-Methoxyphenyl)-2,3-dihydroquinazolin-4(1H)-one (3c).white solid. Yield: (96%).<sup>1</sup>H NMR

(400 MHz, DMSO) δ 8.30 (s, 1H), 7.61 (d, J = 7.6 Hz, 1H), 7.29 (s, 1H), 7.24 (s, 1H), 7.13 (s, 1H), 7.10 – 7.01 (m, 2H), 6.91 (dd, J = 8.1, 2.0 Hz, 1H), 6.75 (d, J = 8.1 Hz, 1H), 6.67 (s, 1H), 5.72 (s, 1H), 3.74 (s, 3H). <sup>13</sup>C NMR (101 MHz, DMSO) δ 165.45, 161.10, 149.68, 145.21, 135.21, 131.32, 129.22, 120.80, 119.00, 116.85, 116.29, 115.56, 114.44, 68.14, 56.97.

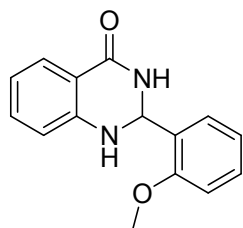

3d

2-(2-Methoxyphenyl)-2,3-dihydroquinazolin-4(1H)-one (3d).white solid. Yield: (94%).<sup>1</sup>H NMR (400 MHz, DMSO)  $\delta$  8.02 (s, 1H), 7.63 (d,  $J = 7.7$  Hz, 1H), 7.41 (d,  $J = 7.5$  Hz, 1H), 7.35 – 7.27 (m, 1H), 7.22 (dd,  $J = 14.1, 6.6$  Hz, 1H), 7.07 – 7.02 (m, 1H), 6.94 (t,  $J = 7.5$  Hz, 1H), 6.81 – 6.75 (m, 2H), 6.67 (s, 1H), 6.08 – 5.98 (m, 1H), 3.81 (d,  $J = 18.9$  Hz, 3H).<sup>13</sup>C NMR (101 MHz, DMSO)  $\delta$  165.76, 158.24, 149.85, 135.13, 131.51, 130.84, 129.20, 128.75, 122.00, 118.91, 116.57, 116.38, 112.97, 62.86, 57.41.

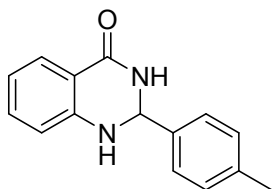

3e

2-(4-methylphenyl)-2,3-dihydroquinazolin-4(1H)-one (3e).white solid. Yield: (95%).<sup>1</sup>H NMR (400 MHz, DMSO- $d_6$ )  $\delta$  8.14 (s, 1H), 7.51 (d,  $J = 7.6$  Hz, 1H), 7.28 (d,  $J = 7.9$  Hz, 2H), 7.14 (t,  $J = 7.5$  Hz, 1H), 7.10 (s, 2H), 6.96 (s, 1H), 6.64 (d,  $J = 8.1$  Hz, 1H), 6.57 (s, 1H), 5.61 (s, 1H), 2.20 (s, 3H).<sup>13</sup>C NMR (101 MHz, DMSO- $d_6$ )  $\delta$  165.53, 149.79, 140.55, 139.60, 135.14, 130.69, 129.21, 128.67, 118.95, 116.87, 116.29, 68.24, 22.60.

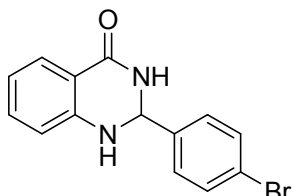

3f

2-(4-bromophenyl)-2,3-dihydroquinazolin-4(1H)-one (3f).white solid. Yield: (96%).<sup>1</sup>H NMR (400 MHz, DMSO- $d_6$ )  $\delta$  8.34 (s, 1H), 7.60 (t,  $J = 7.4$  Hz, 3H), 7.44 (d,  $J = 8.4$  Hz, 2H), 7.25 (t,  $J = 7.7$  Hz, 1H), 7.15 (s, 1H), 6.75 (d,  $J = 8.1$  Hz, 1H), 6.68 (t,  $J = 7.5$  Hz, 1H), 5.76 (s, 1H).<sup>13</sup>C NMR (101 MHz, DMSO- $d_6$ )  $\delta$  165.38, 149.50, 142.98, 135.30, 133.12, 130.96, 129.26, 123.45, 119.19, 116.82, 116.35, 67.68.

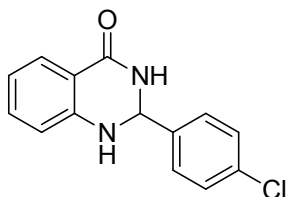

3g

2-(4-chlorophenyl)-2,3-dihydroquinazolin-4(1H)-one (3g).white solid. Yield: (97%).<sup>1</sup>H NMR (400 MHz, DMSO- $d_6$ )  $\delta$  8.34 (s, 1H), 7.61 (d,  $J = 7.7$  Hz, 1H), 7.51 (d,  $J = 8.5$  Hz, 2H), 7.45 (d,  $J = 8.5$  Hz,

2H), 7.25 (s, 1H), 7.14 (s, 1H), 6.75 (d,  $J = 8.1$  Hz, 1H), 6.68 (s, 1H), 5.77 (s, 1H).  $^{13}\text{C}$  NMR (101 MHz, DMSO- $d_6$ )  $\delta$  165.38, 149.53, 142.55, 135.30, 134.86, 130.63, 130.20, 129.25, 119.18, 116.82, 116.35, 67.63.

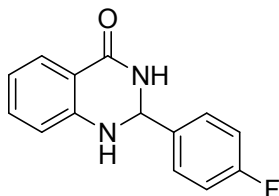

3h

2-(4-fluorophenyl)-2,3-dihydroquinazolin-4(1H)-one (3h). white solid. Yield: (98%).  $^1\text{H}$  NMR (400 MHz, DMSO)  $\delta$  8.28 (s, 1H), 7.61 (d,  $J = 7.7$  Hz, 1H), 7.53 (s, 2H), 7.22 (s, 3H), 7.09 (s, 1H), 6.75 (d,  $J = 8.1$  Hz, 1H), 6.68 (s, 1H), 5.77 (s, 1H).  $^{13}\text{C}$  NMR (101 MHz, DMSO)  $\delta$  165.45, 149.67, 139.69, 135.25, 130.96, 130.87, 129.25, 119.15, 117.08, 116.87, 116.33, 67.80.

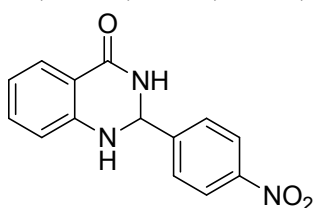

3i

2-(4-nitrophenyl)-2,3-dihydroquinazolin-4(1H)-one (3i). yellow solid. Yield: (99%).  $^1\text{H}$  NMR (400 MHz, DMSO- $d_6$ )  $\delta$  8.52 (s, 1H), 8.25 (d,  $J = 8.6$  Hz, 2H), 7.74 (d,  $J = 8.5$  Hz, 2H), 7.61 (d,  $J = 7.7$  Hz, 1H), 7.33 (s, 1H), 7.26 (s, 1H), 6.77 (d,  $J = 8.1$  Hz, 1H), 6.69 (s, 1H), 5.91 (s, 1H).  $^{13}\text{C}$  NMR (101 MHz, DMSO- $d_6$ )  $\delta$  165.16, 151.21, 149.31, 149.11, 135.46, 129.91, 129.29, 125.47, 119.36, 116.78, 116.43, 67.16.

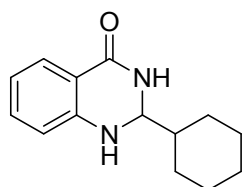

3j

2-cyclohexane-2,3-dihydroquinazolin-4(1H)-one (3j). white solid. Yield: (95%).  $^1\text{H}$  NMR (400 MHz, DMSO- $d_6$ )  $\delta$ : 7.87 (s, 1H), 7.55 (d,  $J = 7.6$  Hz, 1H), 7.19 (s, 1H), 6.74 (d,  $J = 8.1$  Hz, 1H), 6.60 (s, 1H), 6.54 (s, 1H), 4.44 (s, 1H), 1.70 (d,  $J = 10.6$  Hz, 6H), 1.11 (s, 5H);  $^{13}\text{C}$  NMR (101 MHz, DMSO- $d_6$ )  $\delta$ : 165.58, 150.24, 134.90, 129.11, 118.30, 116.68, 115.96, 70.45, 44.74, 41.63, 41.42, 41.21, 28.88, 28.56, 27.82, 27.50, 27.44.

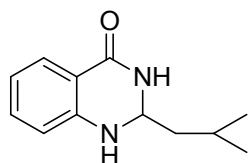

3k

2-methylpropyl-2,3-dihydroquinazolin-4(1H)-one (3k), white solid. Yield: (95%).  $^1\text{H}$

NMR (400MHz, DMSO-d<sub>6</sub>) δ: 7.89 (s, 1H) , 7.58 (d, J=7.4Hz, 1H) , 7.23 (s, 1H) , 6.75 (d, J=8.1Hz, 1H) , 6.66 (s, 1H) , 6.55 (s, 1H) , 4.71 (s, 1H) , 1.87 (s, 1H) , 1.52 (s, 2H) , 0.89 (d, J=6.5Hz, 6H) ; <sup>13</sup>CNMR (101MHz, DMSO-d<sub>6</sub>) δ: 165.71, 150.20, 134.90, 129.25, 118.82, 117.10, 116.40, 64.59, 46.16, 24.75, 24.62, 24.35.

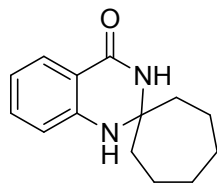

3l

1'H-Spiro [cycloheptane -1,2'-quinazolin]-4'(3'H)-one(3l), white solid. Yield: (96%).<sup>1</sup>H NMR (400MHz, DMSO-d<sub>6</sub>) δ: 8.02 (s, 1H) , 7.54 (d, J=7.7Hz, 1H) , 7.20 (t, J=7.6Hz, 1H) , 6.71 (s, 2H) , 6.59 (s, 1H) , 1.87 (s, 4H) , 1.50 (s, 8H) ; <sup>13</sup>C NMR (101MHz, DMSO-d<sub>6</sub>) δ: 164.48, 148.62, 134.98, 128.94, 118.18, 116.22, 116.13, 73.80, 42.88, 31.08, 22.74.

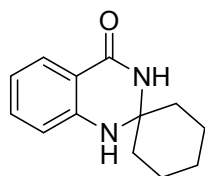

3m

1'H-Spiro [cyclohexane-1,2'-quinazolin]-4'(3'H)-one(3m), white solid. Yield: (98%).<sup>1</sup>H NMR (400MHz, DMSO-d<sub>6</sub>) δ: 7.93 (s, 1H) , 7.58 (d, J=7.6Hz, 1H) , 7.21 (t, J=7.6Hz, 1H) , 6.81 (d, J=8.1Hz, 1H) , 6.69-6.58 (m, 2H) , 1.83-1.68 (m, 2H) , 1.66-1.50 (m, 6H) , 1.46-1.38 (m, 1H) , 1.25 (d, J=13.0、6.5Hz, 1H) ; <sup>13</sup>C NMR (101MHz, DMSO-d<sub>6</sub>) δ: 165.10, 148.65, 134.99, 128.98, 118.36, 116.46, 116.33, 69.69, 39.05, 26.53, 22.77.

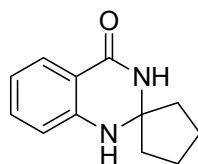

3n

1'H-Spiro [cyclopentane-1,2'-quinazolin]-4'(3'H)-one(3n), white solid. Yield: (90%). white solid. Yield: (96%).<sup>1</sup>H NMR (400MHz, DMSO-d<sub>6</sub>) δ: 8.10 (s, 1H) , 7.58 (d, J=7.6Hz, 1H) , 7.21 (s, 1H) , 6.74 (s, 2H) , 6.63 (s, 1H) , 1.79 (s, 4H) , 1.66 (s, 4H) ; <sup>13</sup>C NMR (101MHz, DMSO-d<sub>6</sub>) δ: 165.31, 149.41, 134.88, 129.13, 118.43, 116.48, 116.22, 78.96, 42.05, 23.87.

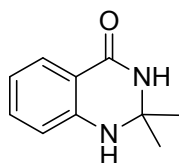

3o

2,2-dimethyl-2,3-Dihydro-quinazolin-4(1H)-one(3o), white solid. Yield:



(96%).<sup>1</sup>H NMR (400MHz, DMSO-d<sub>6</sub>) δ: 7.94 (s, 1H) , 7.58 (d, J=7.6Hz, 1H) , 7.22 (s, 1H) , 6.65 (d, J=1.0Hz, 3H) , 1.38 (s, 6H) ; <sup>13</sup>C NMR (101MHz, DMSO-d<sub>6</sub>) δ: 164.95, 148.96, 135.08, 129.06, 118.32, 116.12, 115.73, 68.72, 30.88.

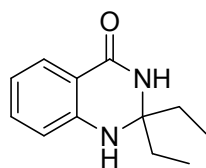

3p

2,2-diethyl-2,3-Dihydro-quinazolin-4(1H)-one(3p), white solid. Yield: (95%).<sup>1</sup>H NMR (400MHz, DMSO-d<sub>6</sub>) δ: 7.75 (s, 1H) , 7.53 (d, J=7.6Hz, 1H) , 7.17 (s, 1H) , 6.65 (d, J=8.1Hz, 1H) , 6.54 (s, 1H) , 6.49 (s, 1H) , 1.59 (d, J=3.1Hz, 4H) , 0.86 (s, 6H) ; <sup>13</sup>C NMR (101MHz, DMSO-d<sub>6</sub>) δ: 165.24, 149.56, 135.02, 128.87, 117.40, 115.44, 114.89, 73.84, 34.62, 9.78.

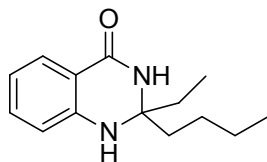

3q

2-ethyl-2-(n-butyl)-2,3-dihydro-quinazolin-4(1H)-one (3q), white solid. Yield: (97%).<sup>1</sup>H NMR (400MHz, DMSO-d<sub>6</sub>) δ: 7.74 (s, 1H) , 7.52 (d, J=7.6Hz, 1H) , 7.21-7.13 (m, 1H) , 6.62 (d, J=8.1Hz, 1H) , 6.53 (s, 1H) , 6.48 (s, 1H) , 1.56 (s, 4H) , 1.23 (d, J=6.9Hz, 4H) , 0.85 (d, J=5.3Hz, 6H) ; <sup>13</sup>C NMR (101MHz, DMSO-d<sub>6</sub>) δ: 165.11, 149.49, 135.01, 128.86, 117.37, 115.40, 114.82, 73.47, 41.89, 35.04, 27.18, 24.28, 15.93, 9.79.

## 8. HRMS spectra

Acquisition Parameter

|             |            |                       |           |                  |           |
|-------------|------------|-----------------------|-----------|------------------|-----------|
| Source Type | ESI        | Ion Polarity          | Positive  | Set Nebulizer    | 0.4 Bar   |
| Focus       | Not active | Set Capillary         | 4500 V    | Set Dry Heater   | 180 °C    |
| Scan Begin  | 100 m/z    | Set End Plate Offset  | -500 V    | Set Dry Gas      | 4.0 l/min |
| Scan End    | 1000 m/z   | Set Collision Cell RF | 200.0 Vpp | Set Divert Valve | Waste     |

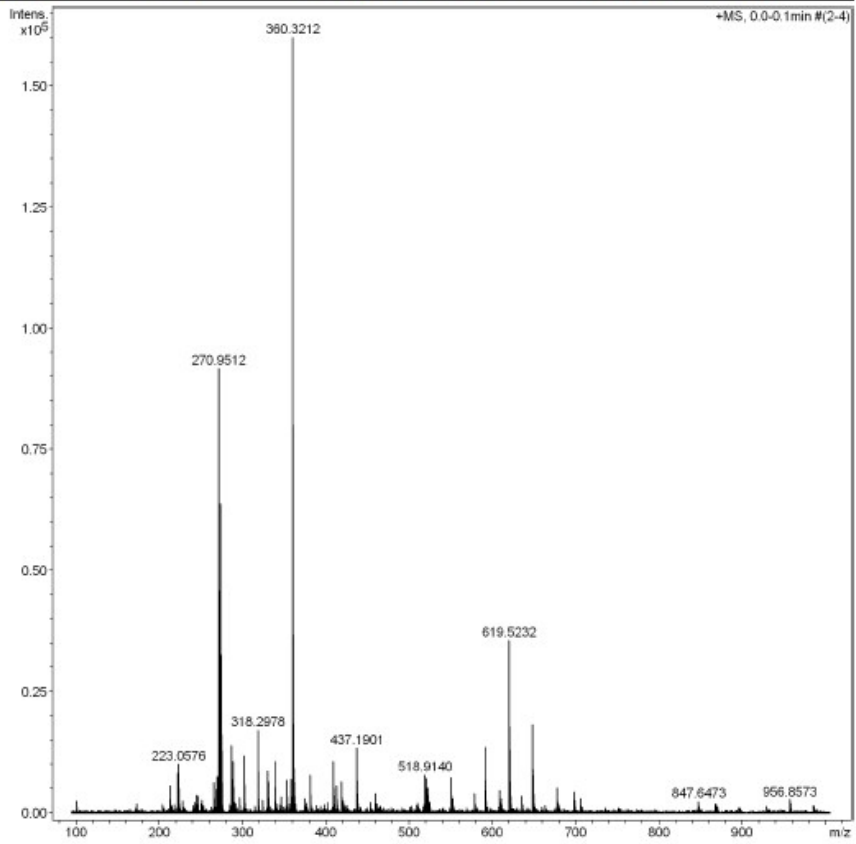

FigureS2: ESI(+)-MS for CID of Cp<sub>2</sub>TiCl<sub>2</sub> inCH<sub>3</sub>OH solution (m/z 100-1000).

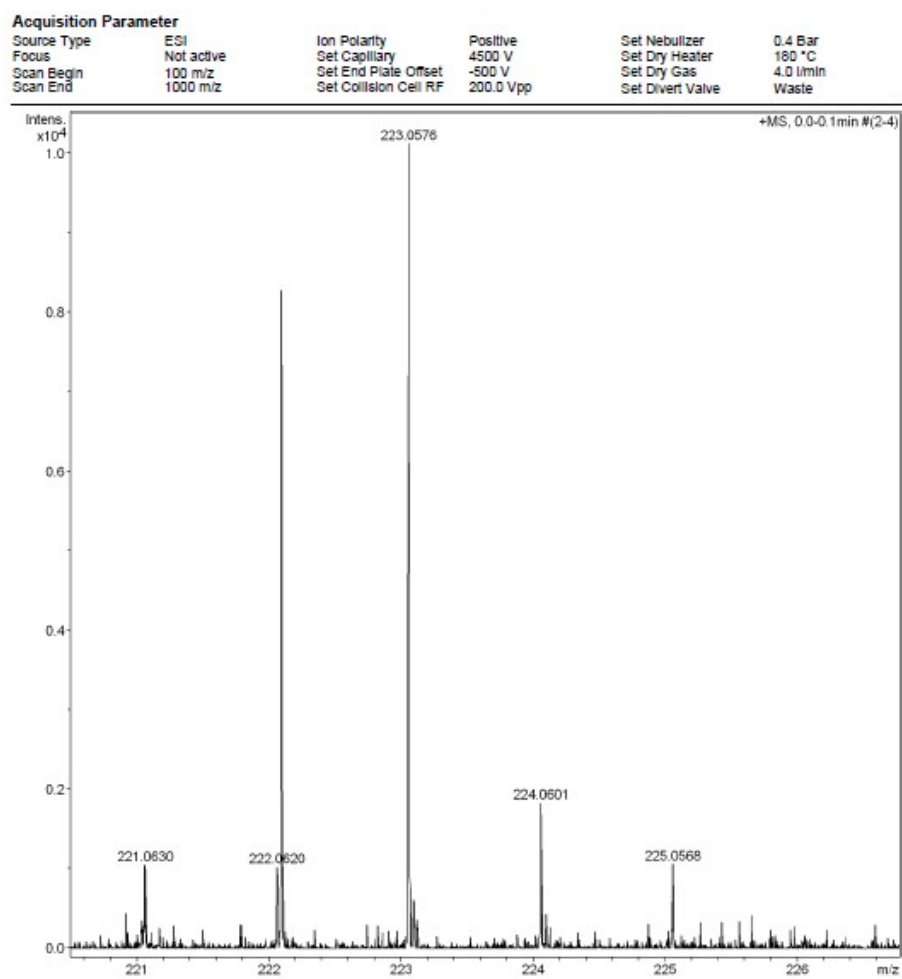

FigureS3: HR-MS for CID of  $\text{Cp}_2\text{TiCl}_2$  in  $\text{CH}_3\text{OH}$  solution (m/z 200-227).

# 9 Copies of <sup>1</sup>H NMR and <sup>13</sup>C NMR spectra

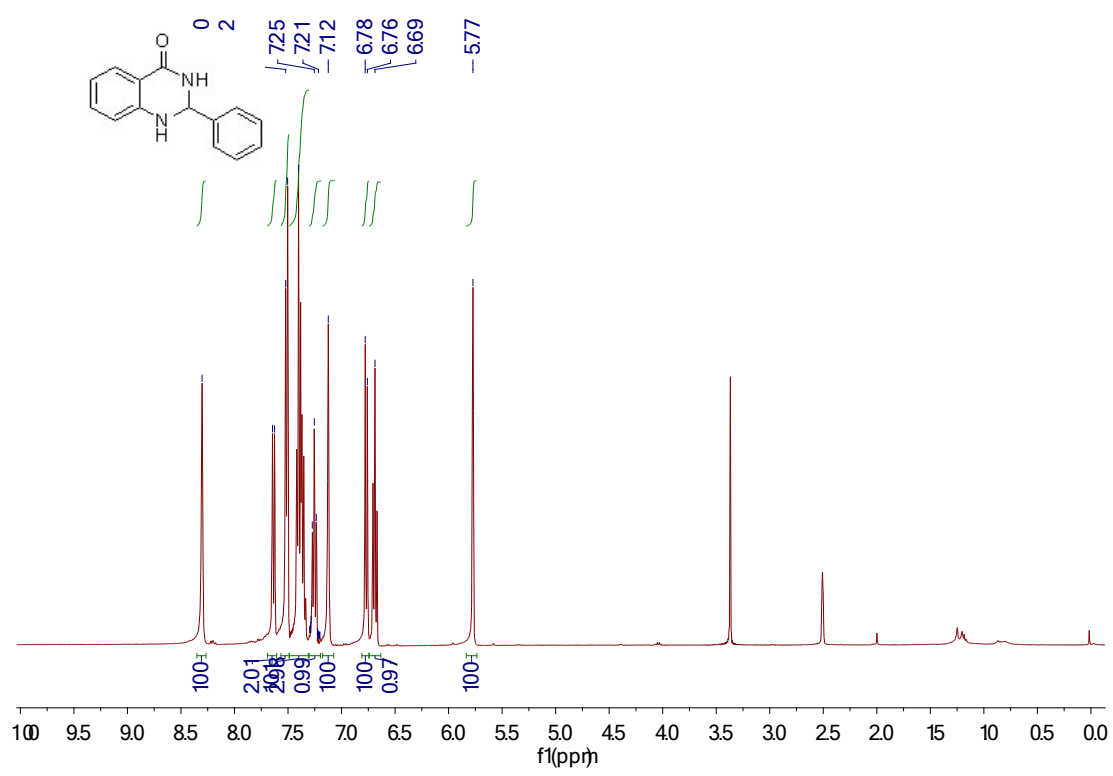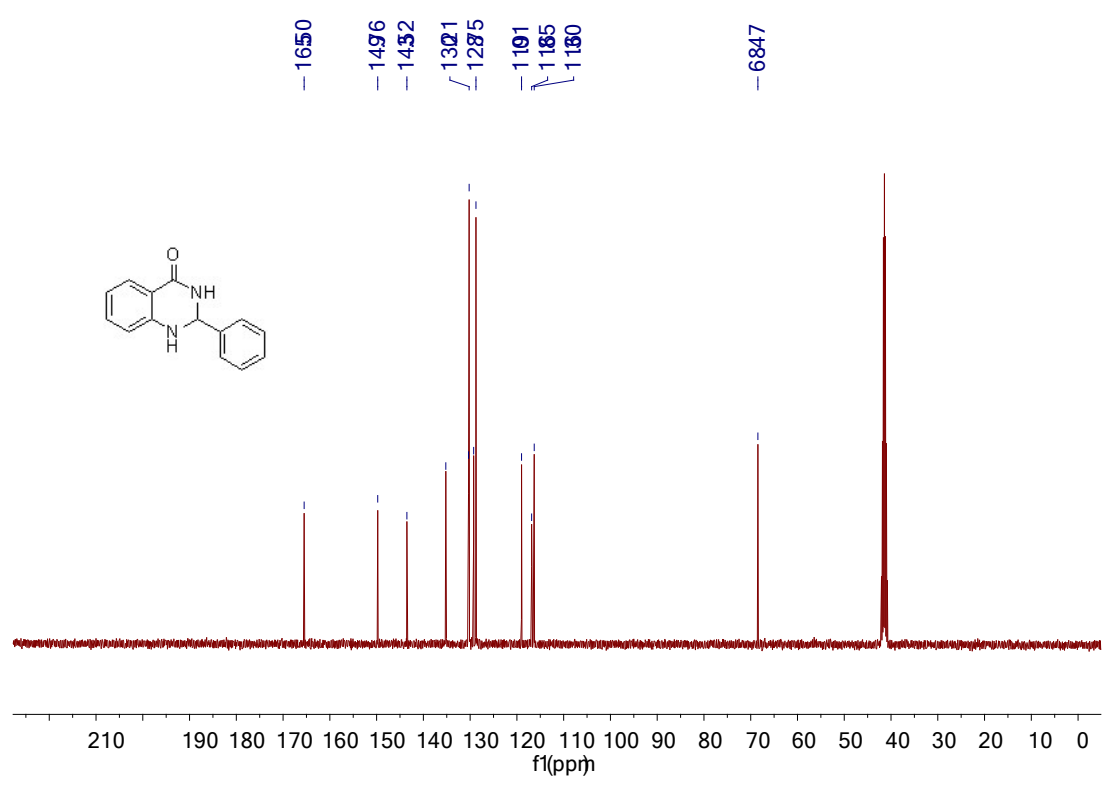

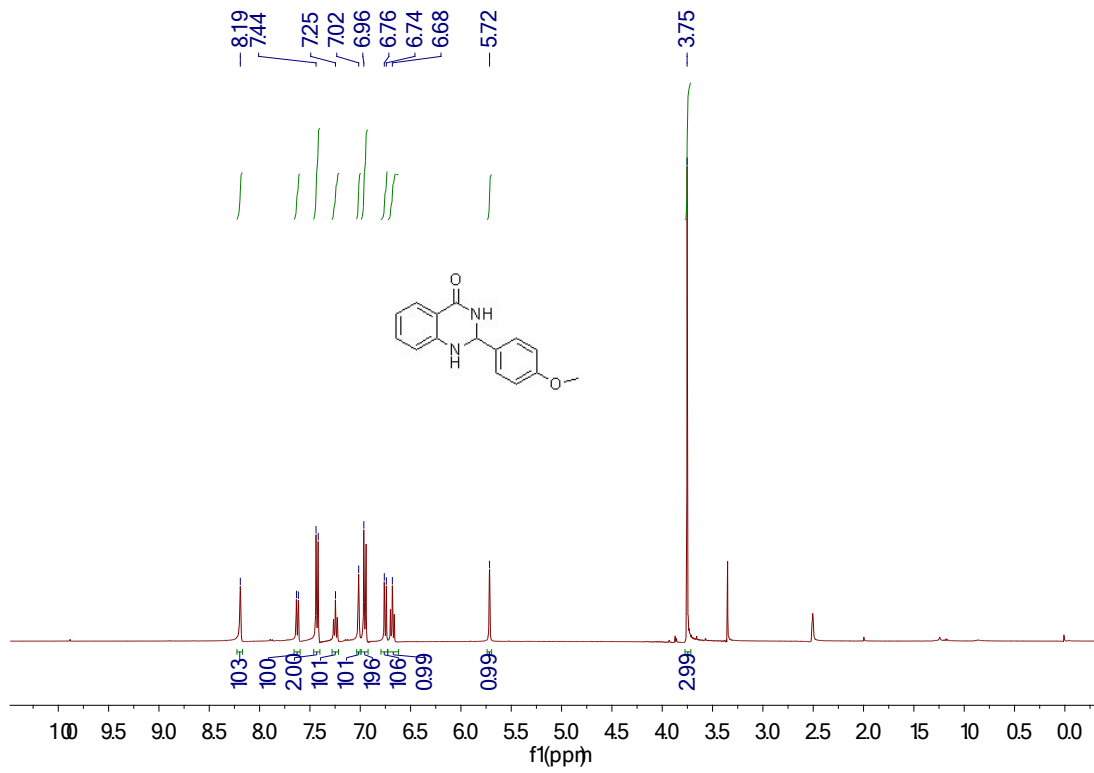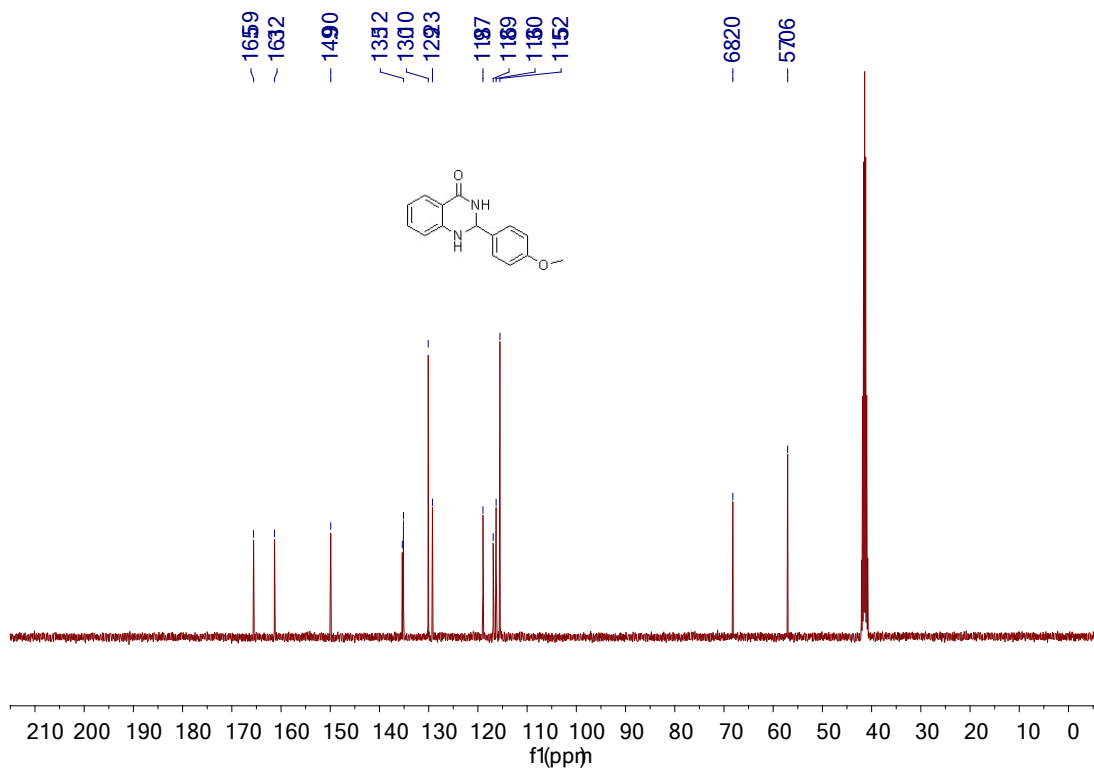

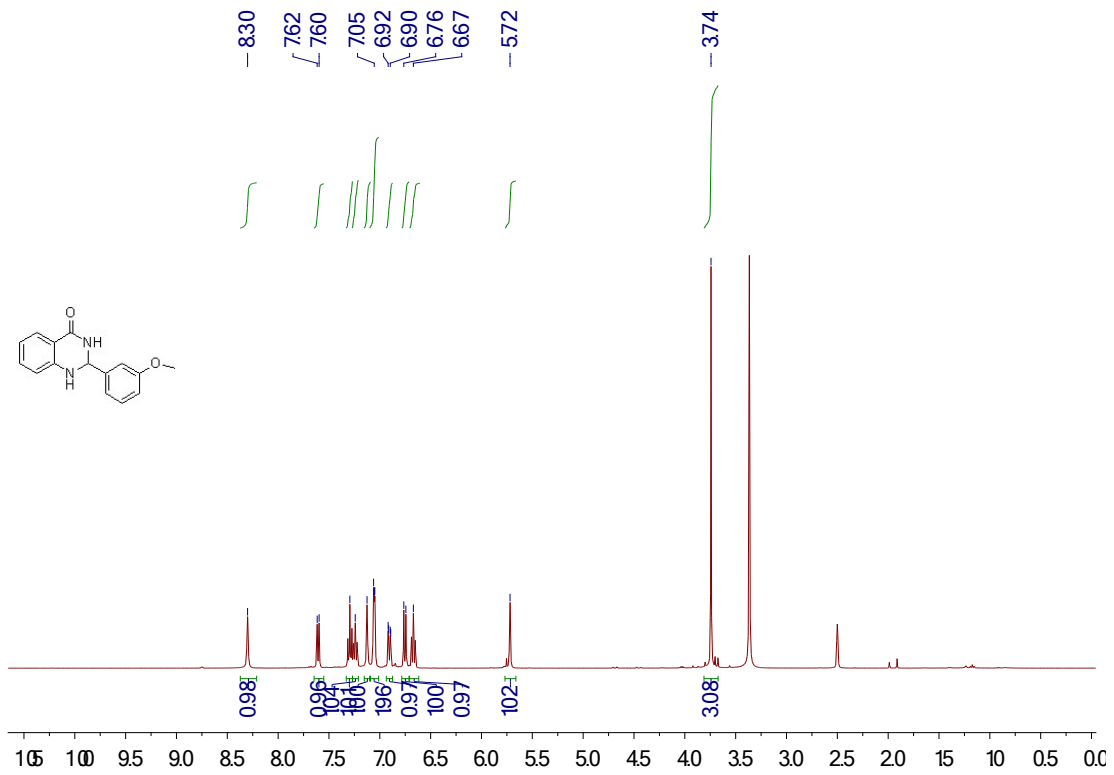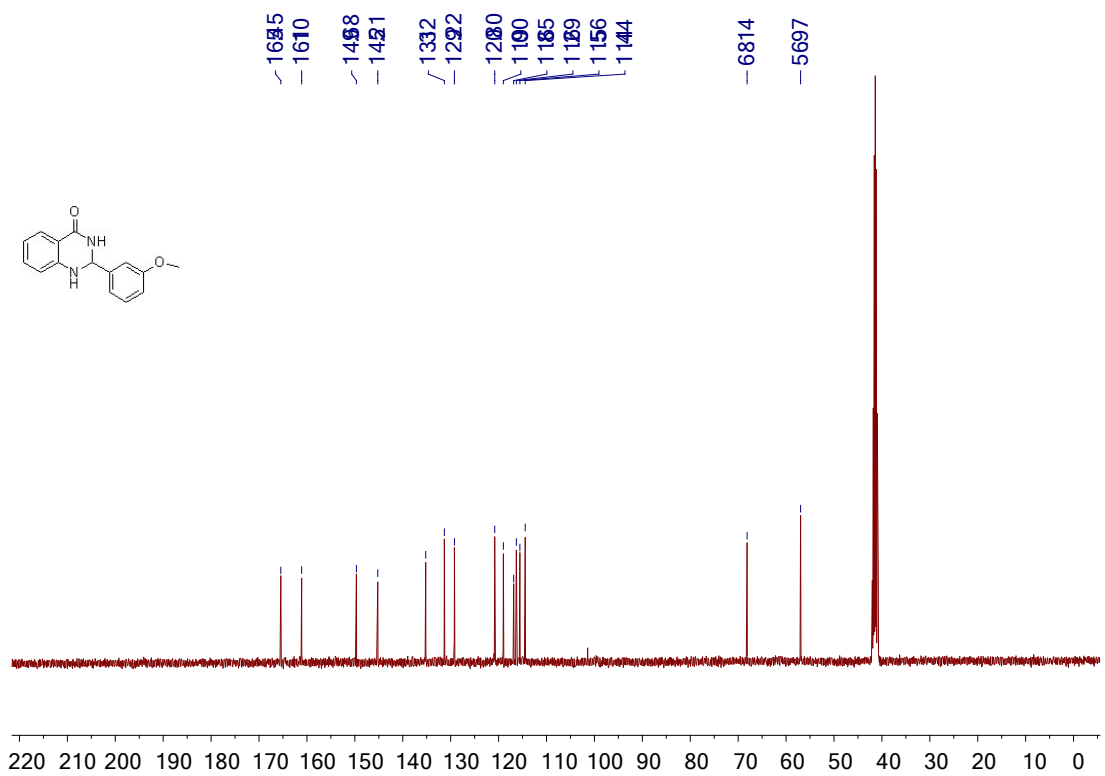

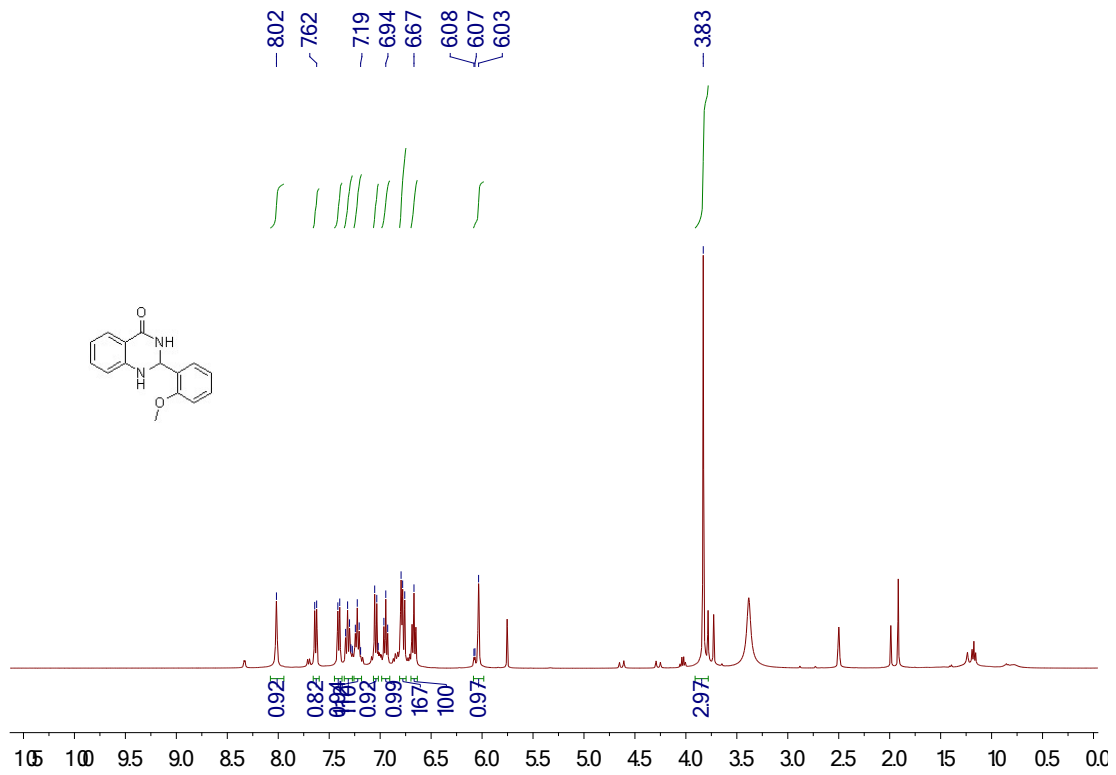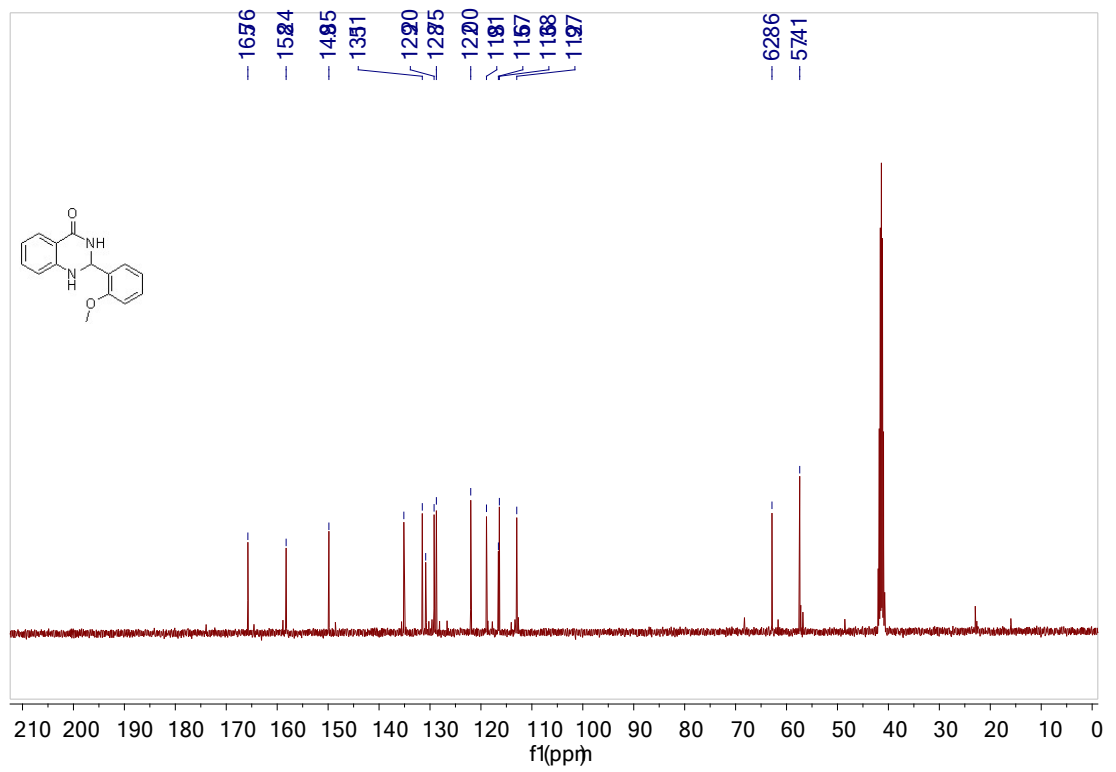

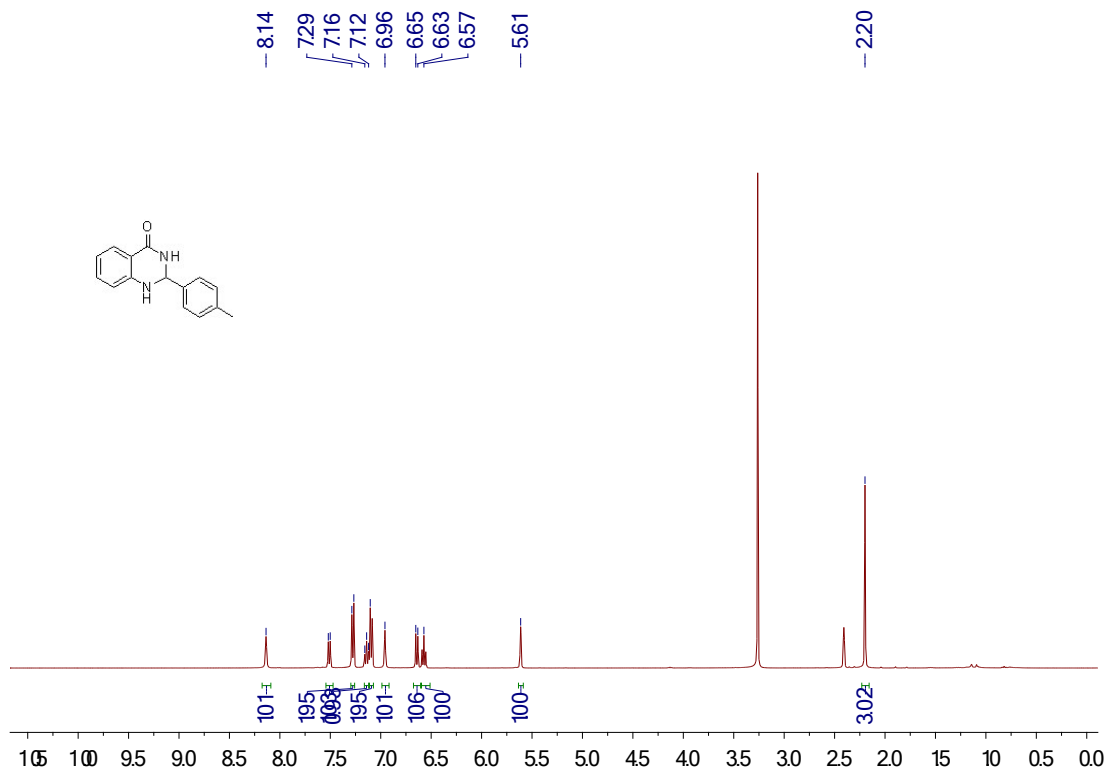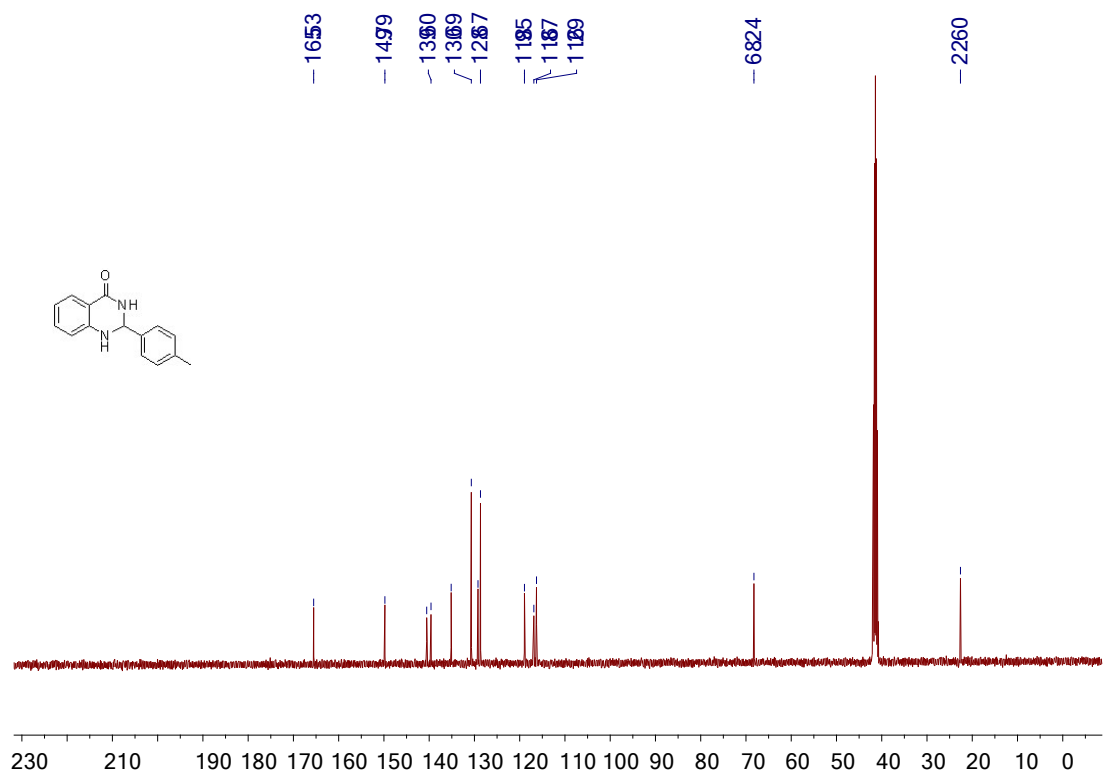



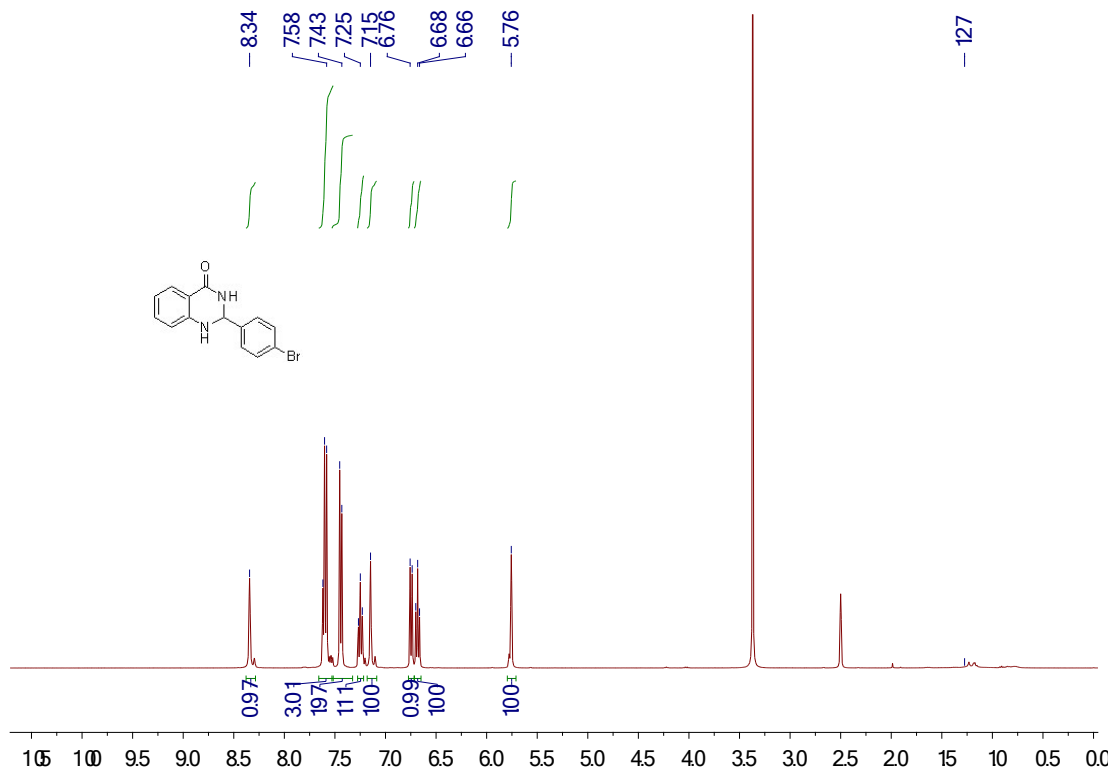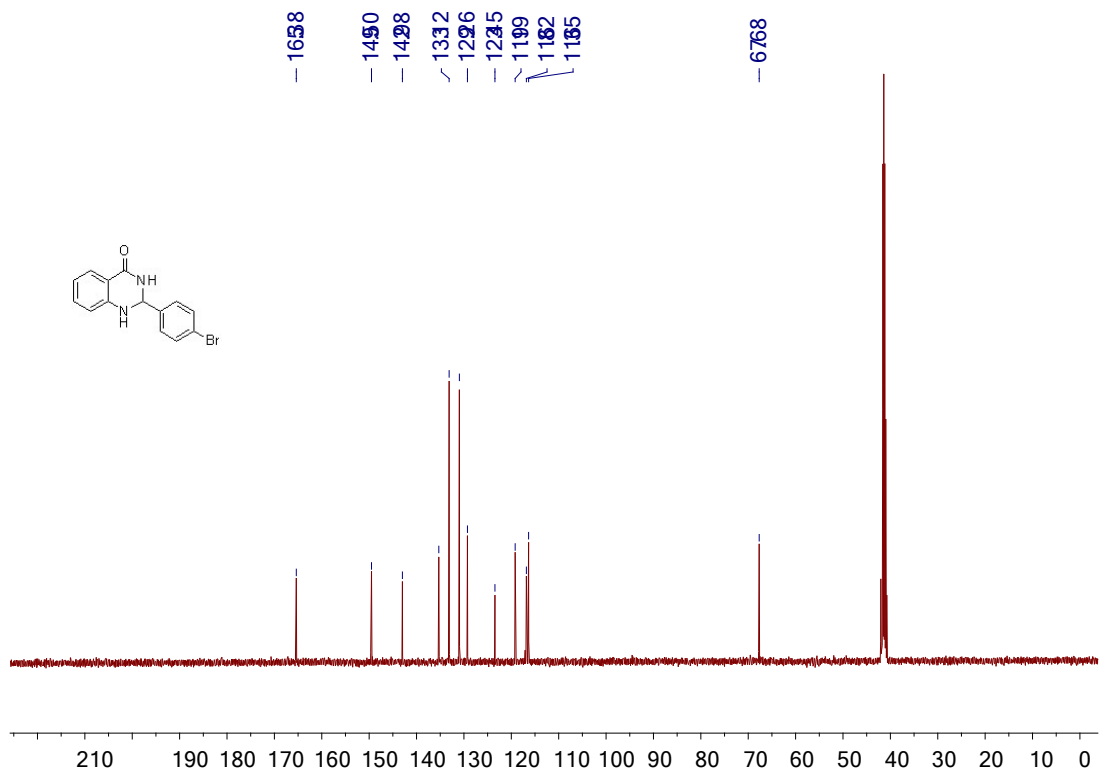

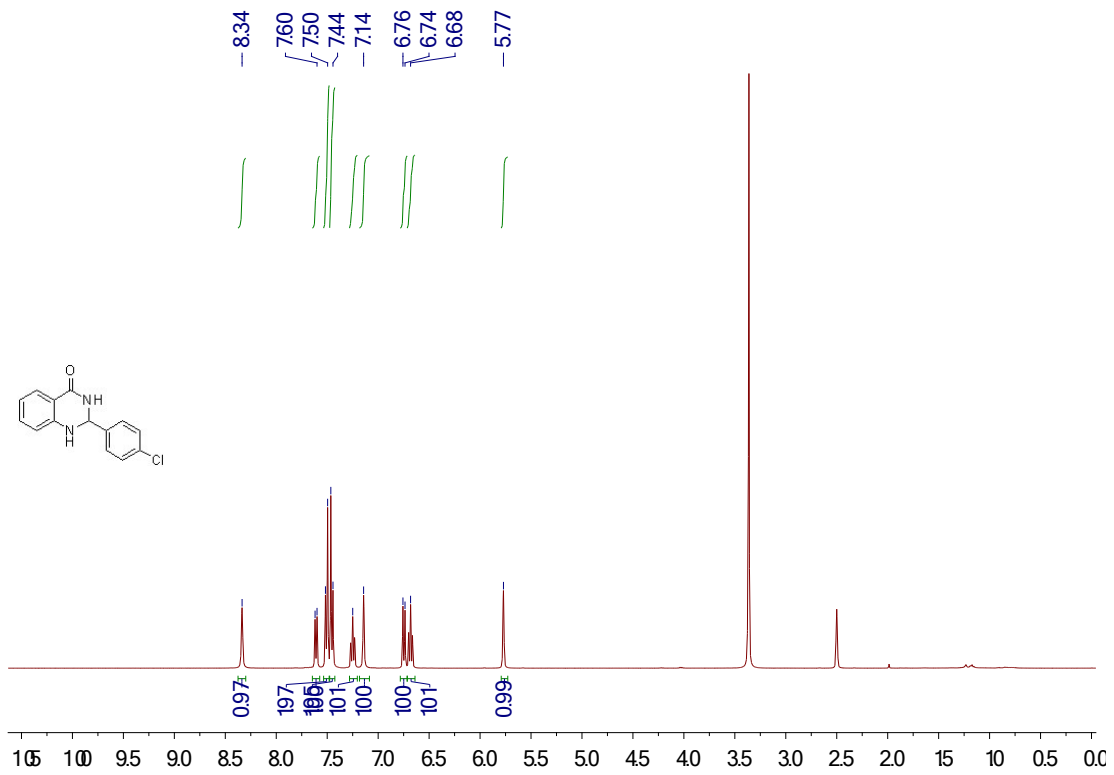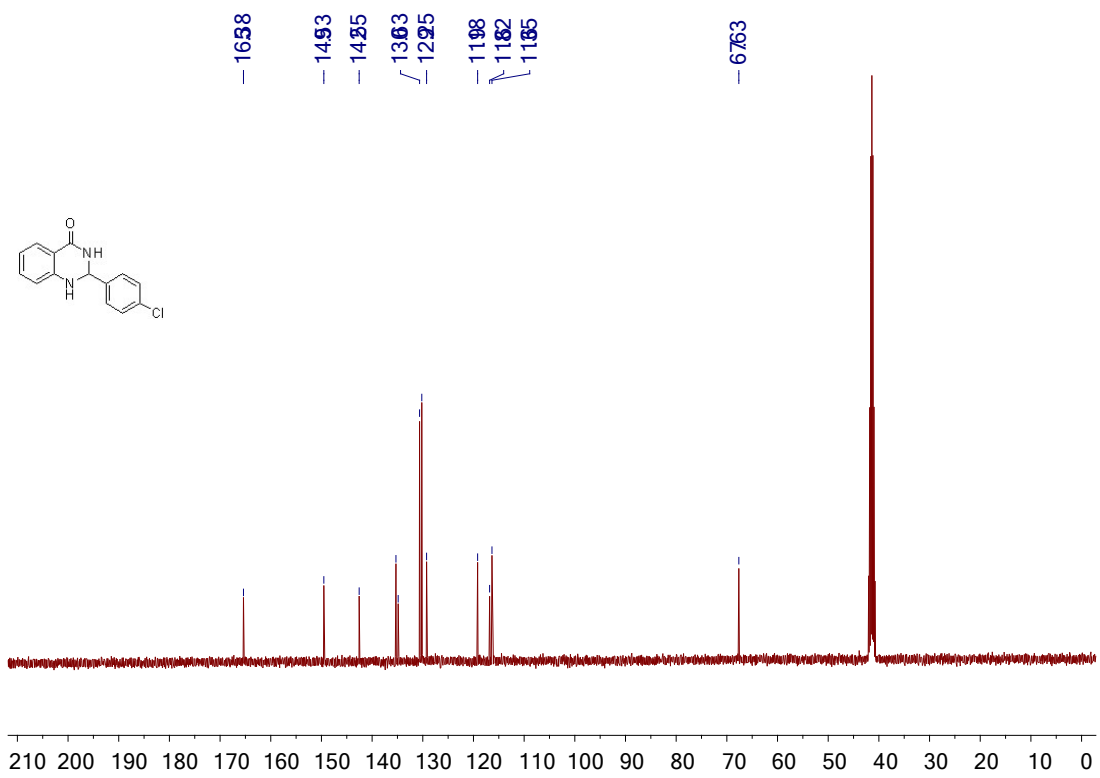

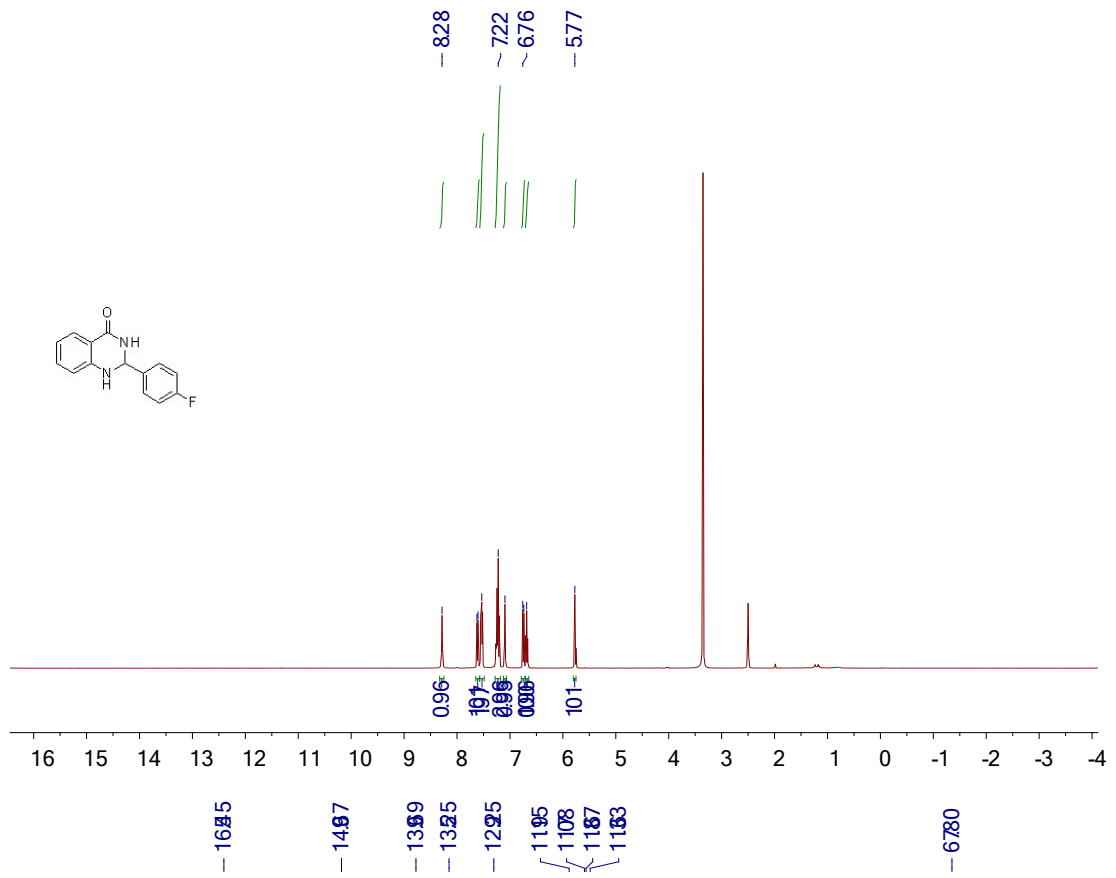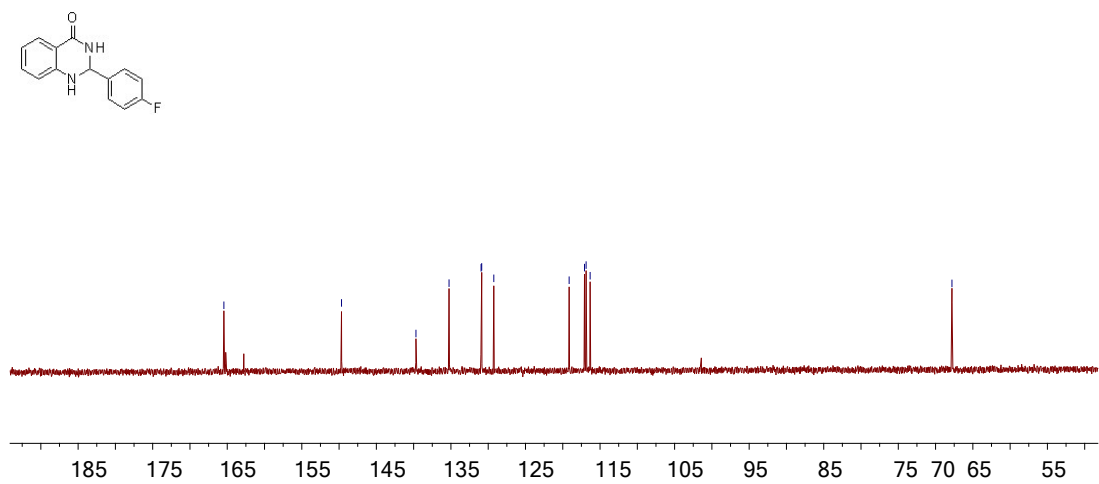

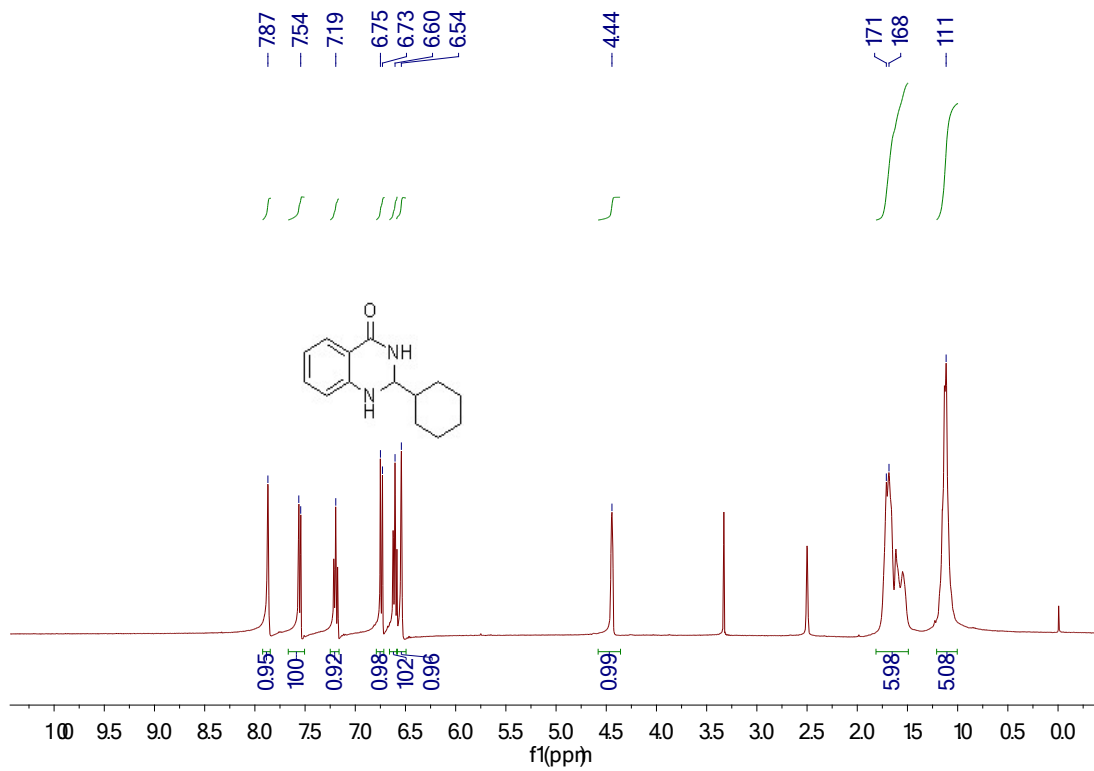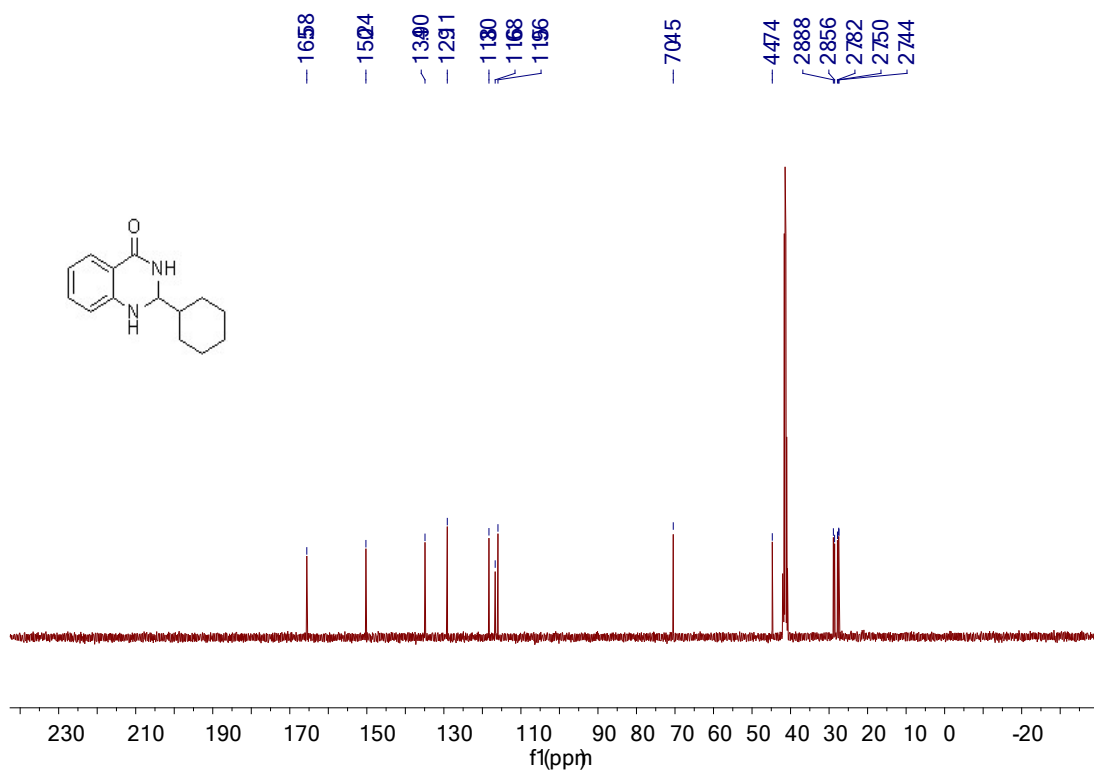

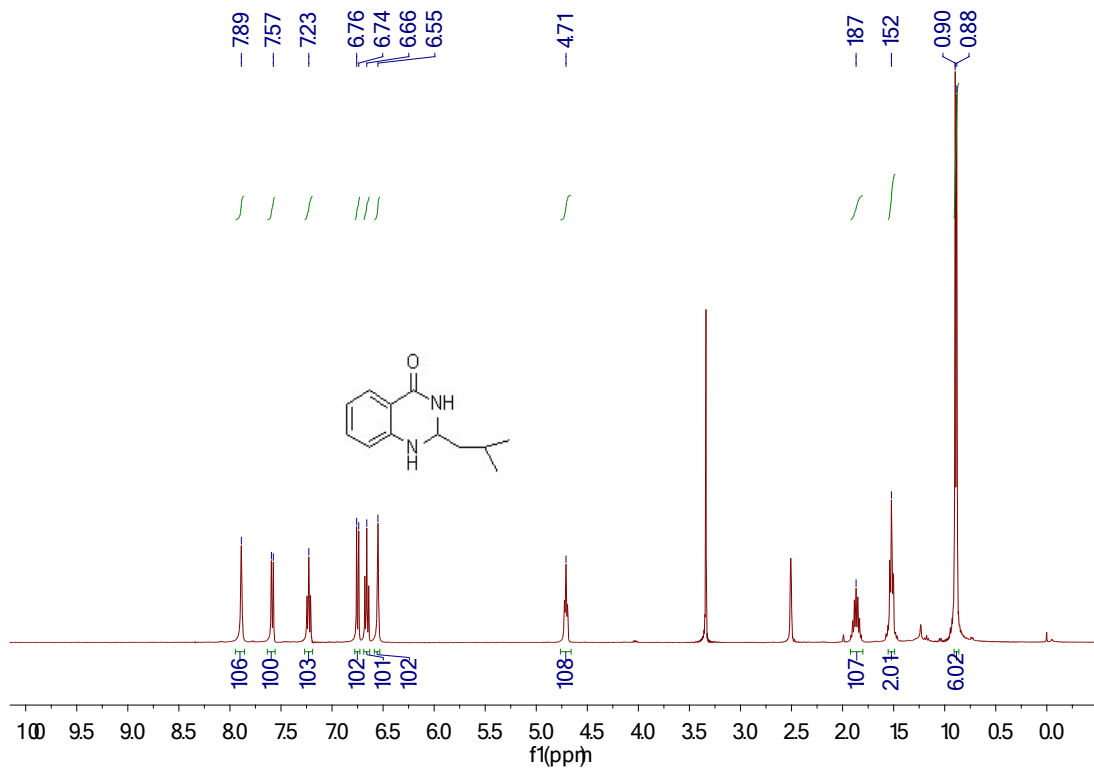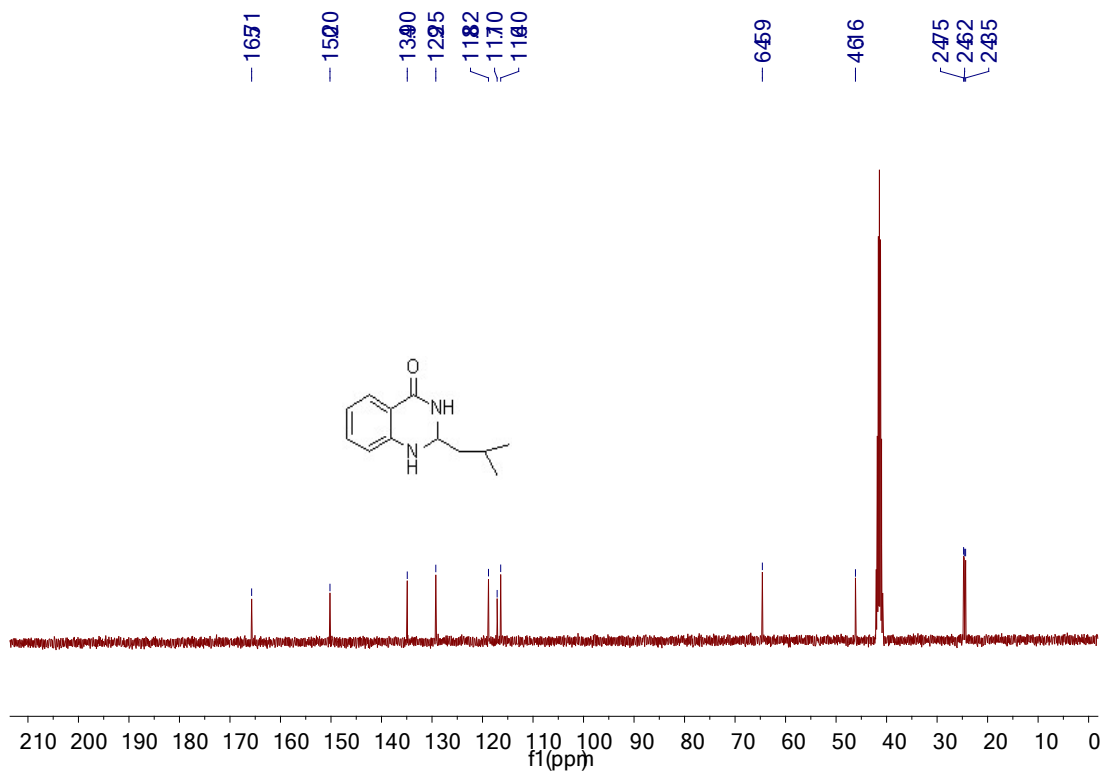

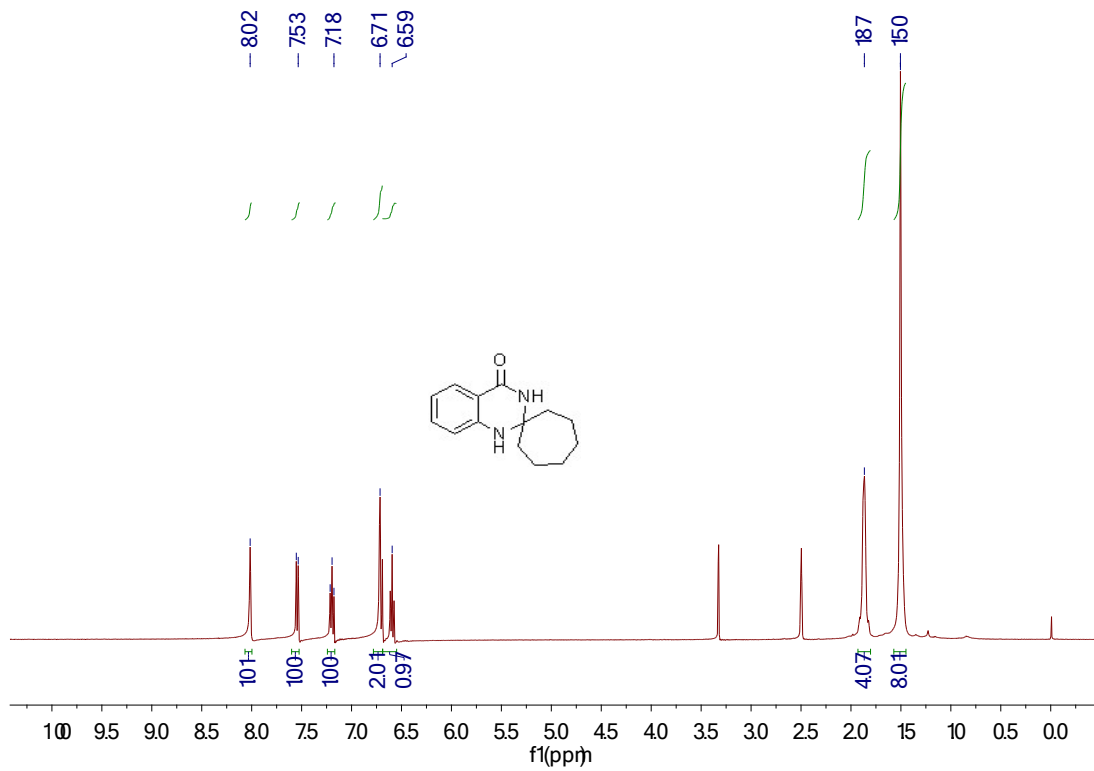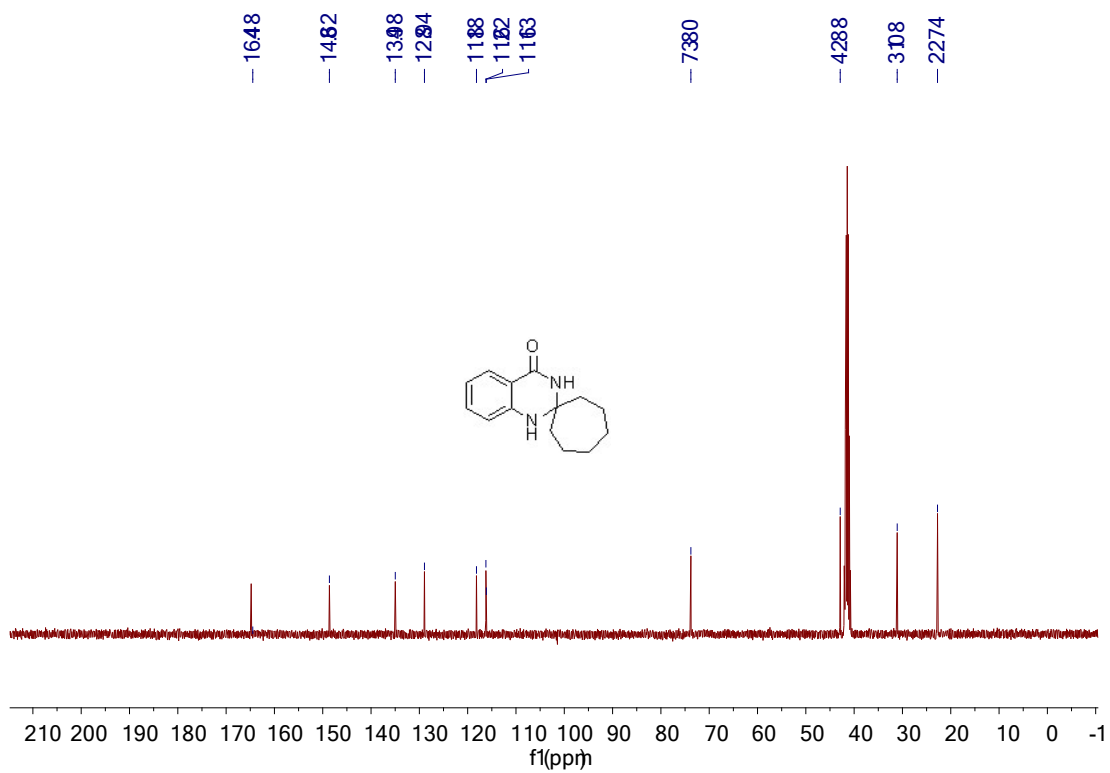

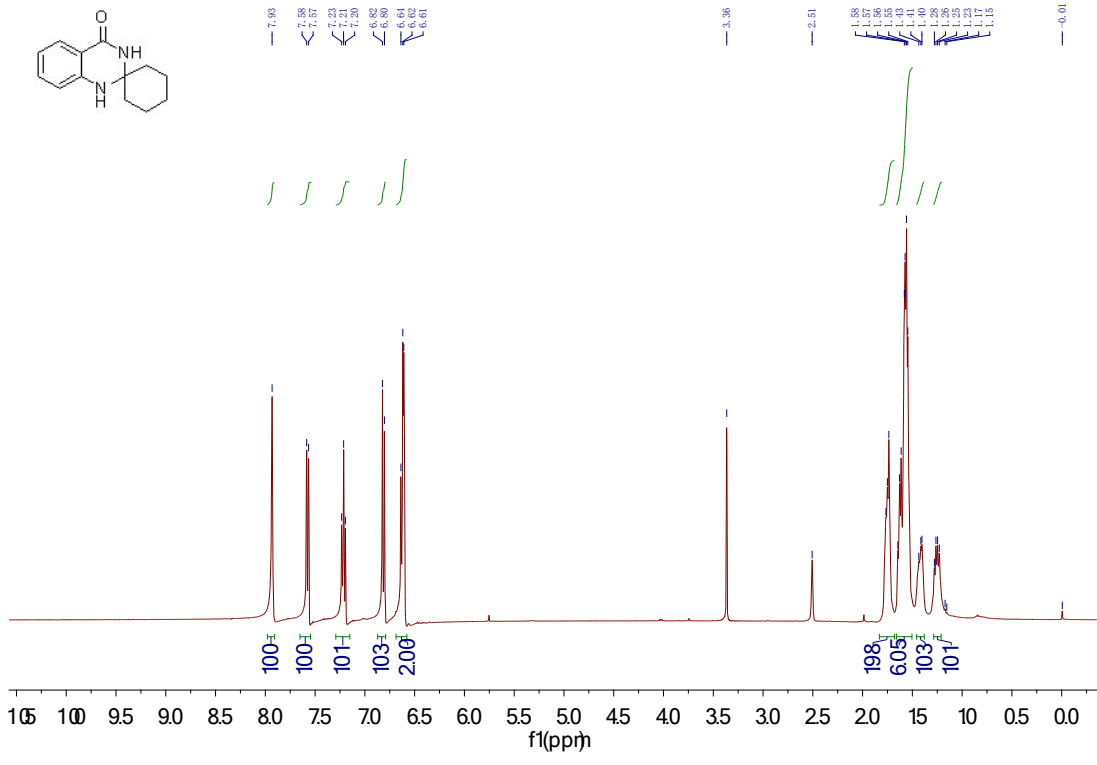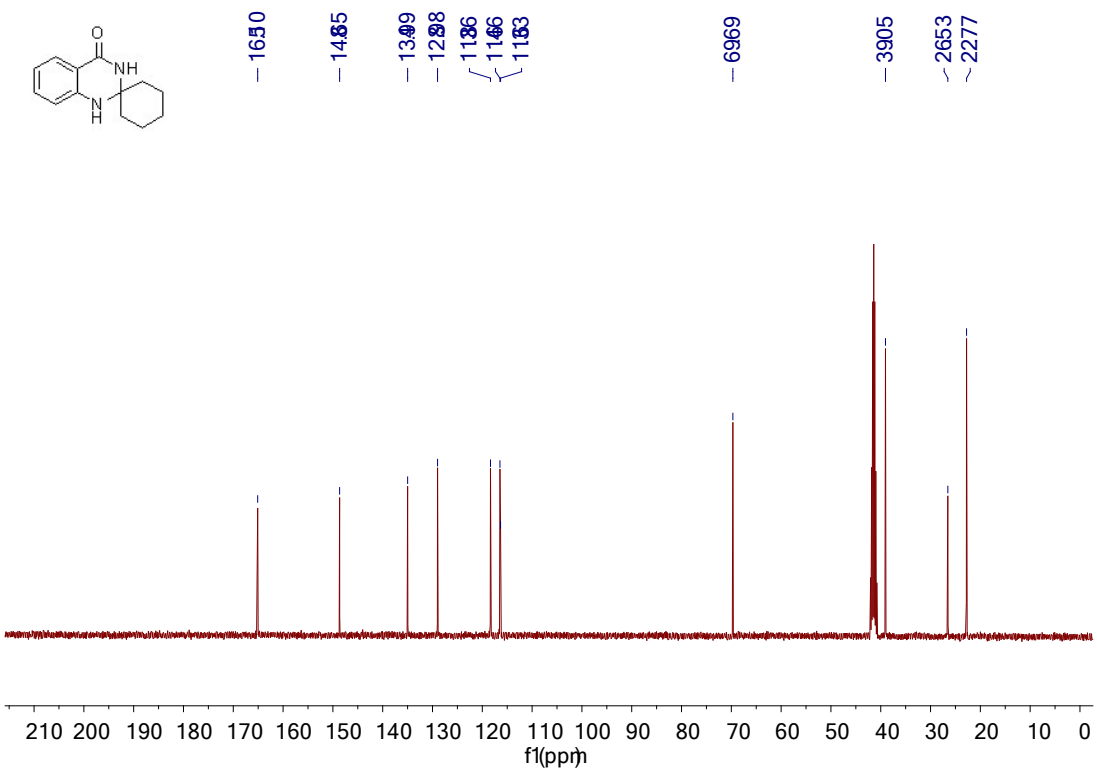

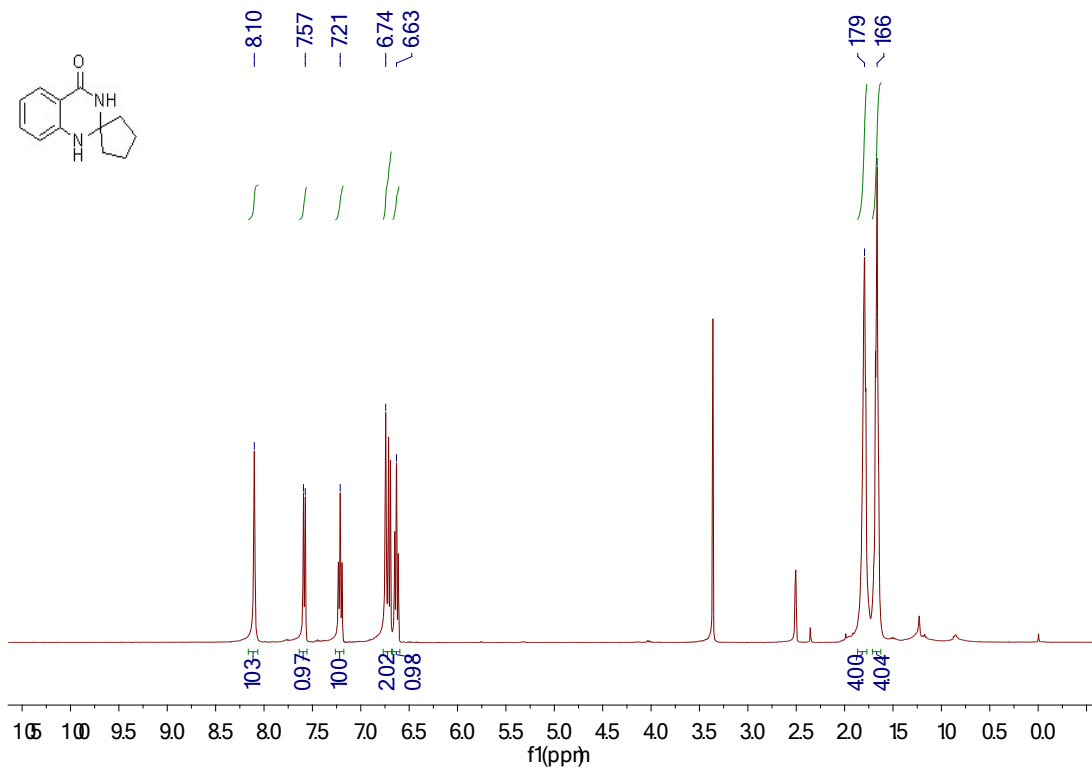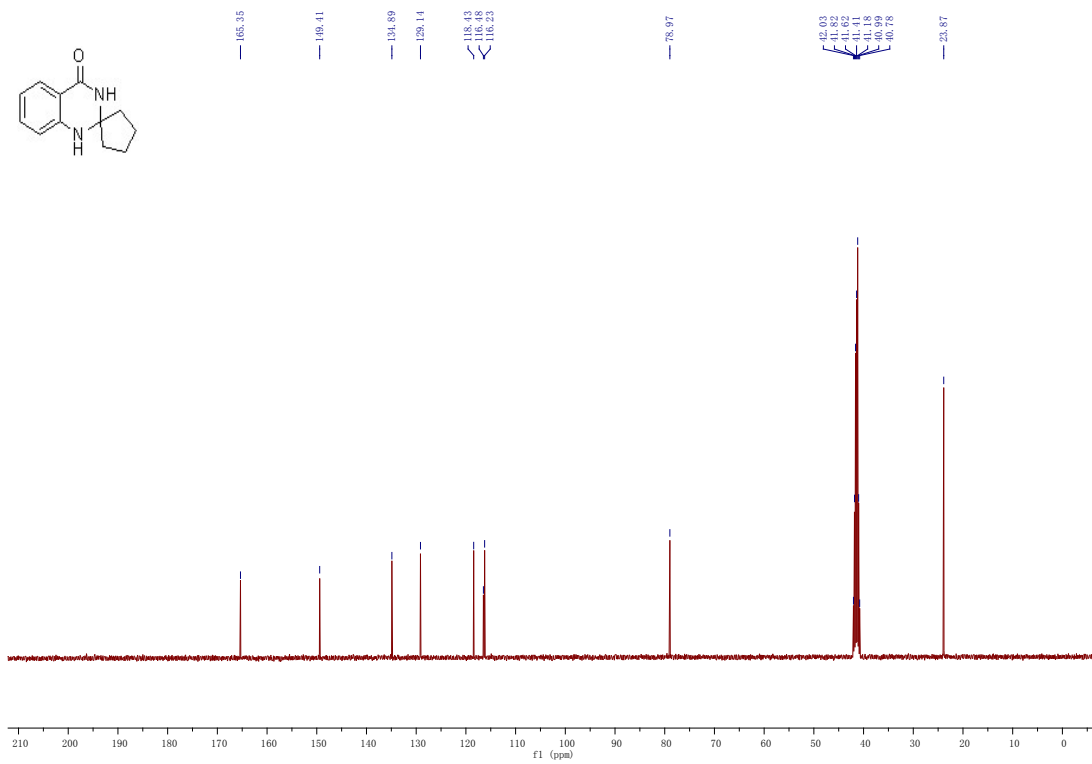



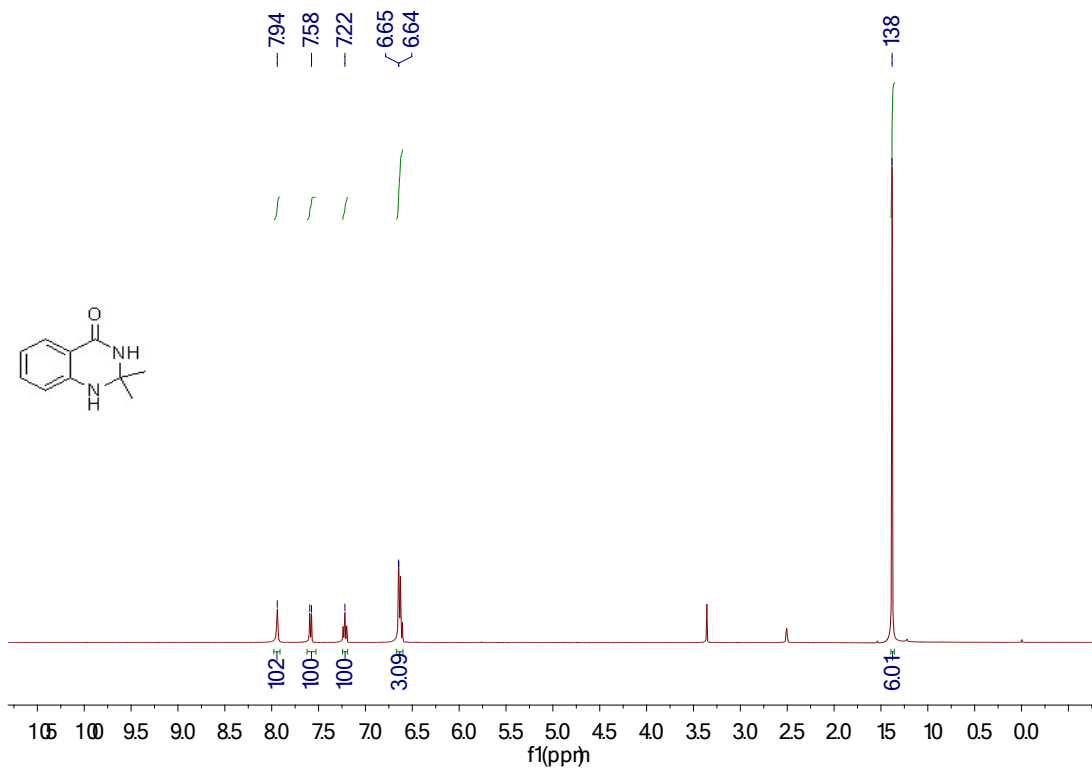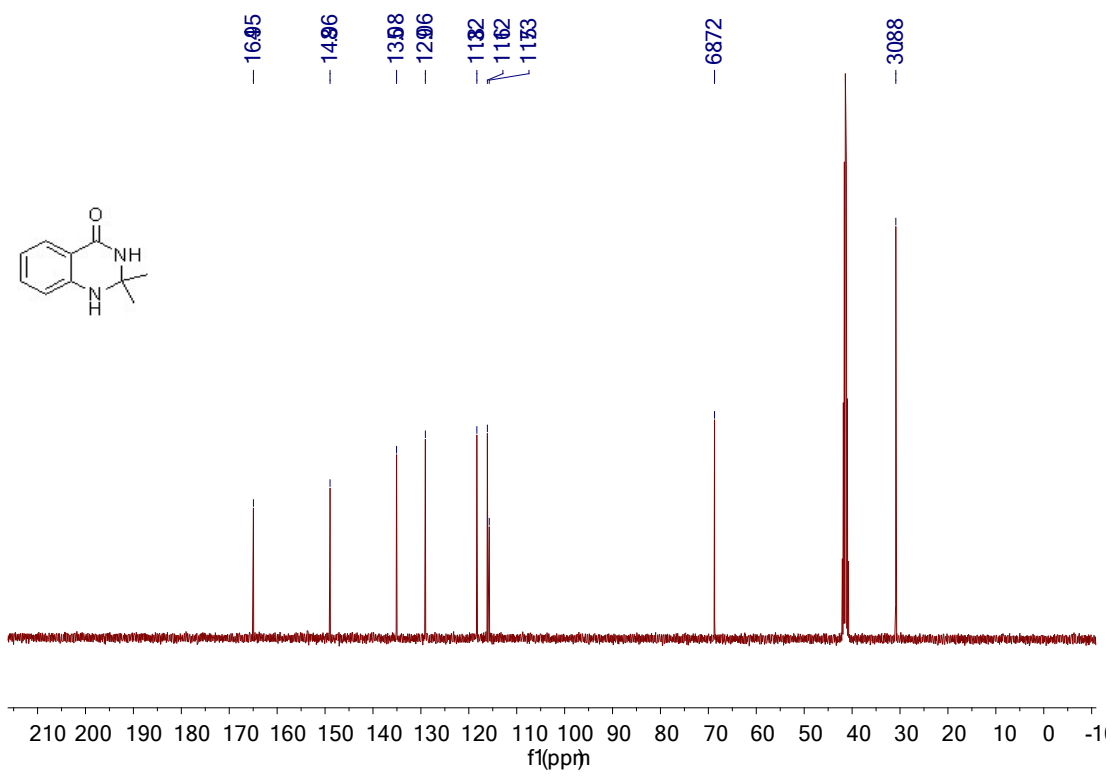

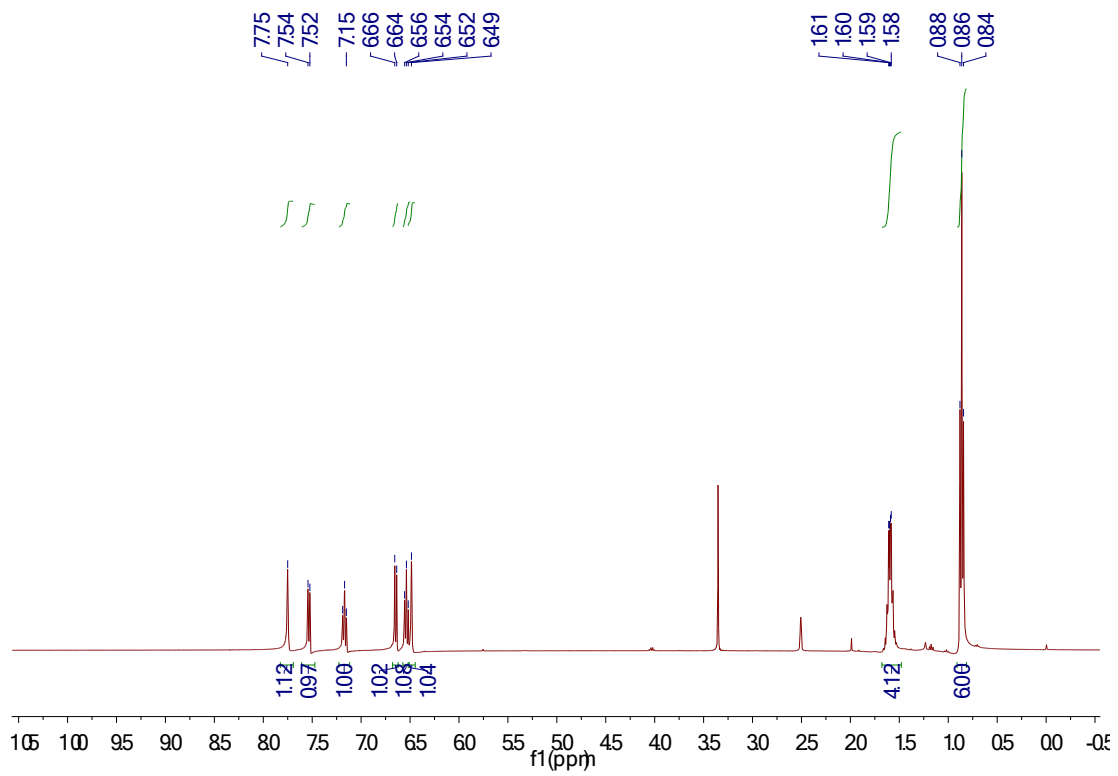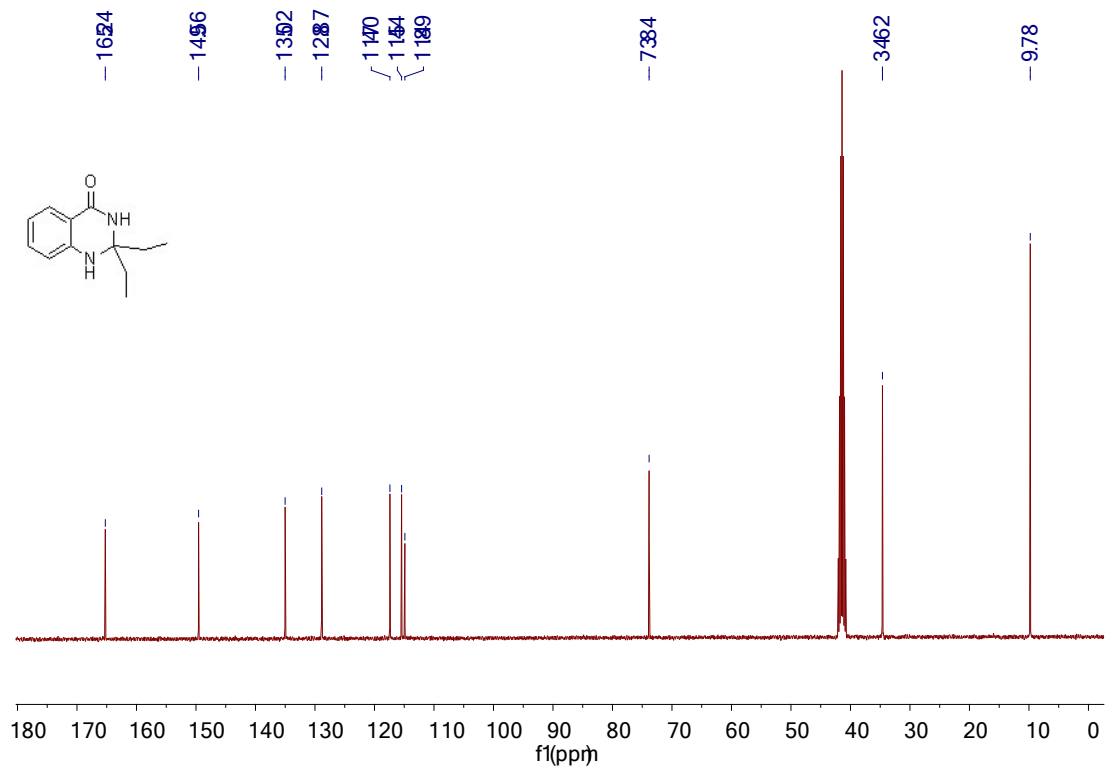

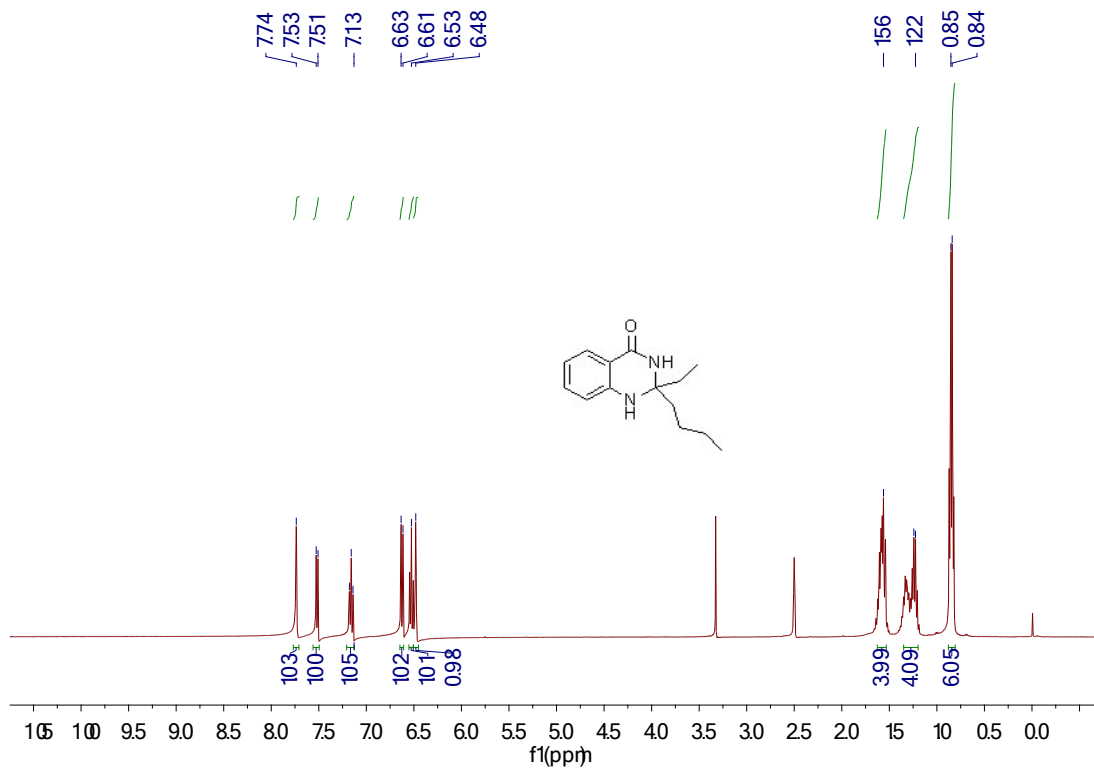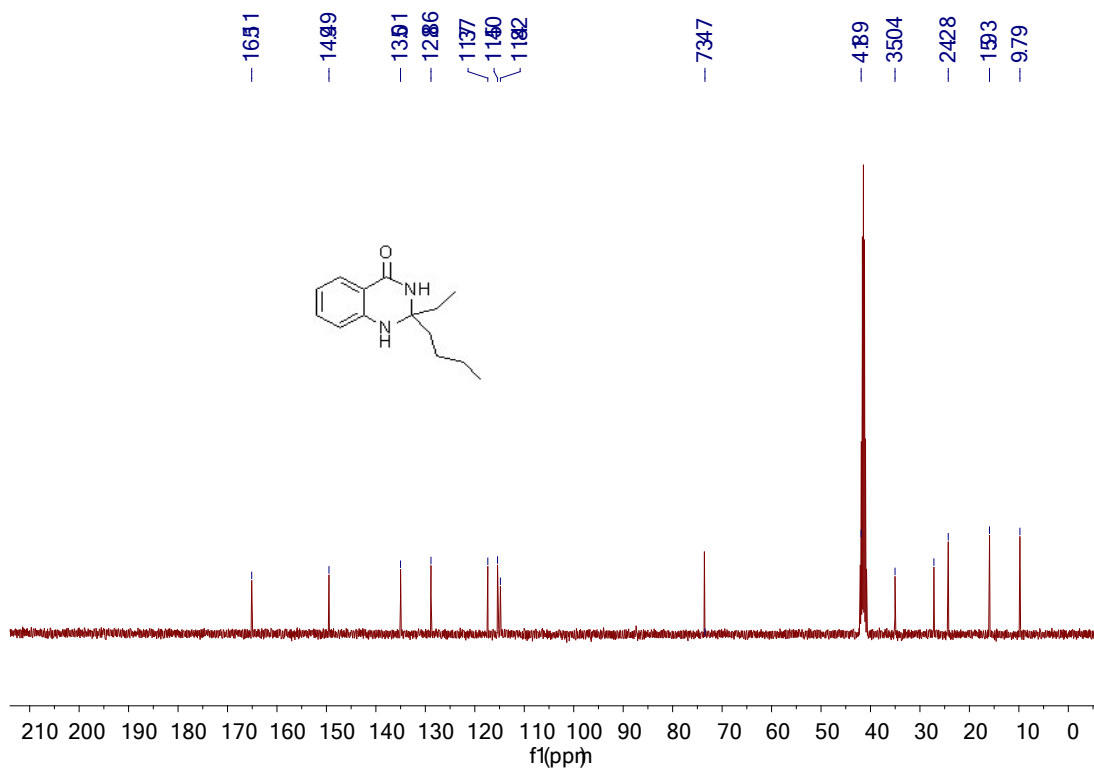

Supplement: c6ra14583c1.pdf [file c6ra14583c1.pdf]
